# Supplementary material for: Targeted multi-analyte UHPLC-MS/MS methodology for emerging contaminants in septic tank wastewater, sludge and receiving surface water
Source: Royal Society of Chemistry journal article supplement (doi:10.1039/d3ay01201h), 2024-01-01
Supplement: d3ay01201h1.pdf [file d3ay01201h1.pdf]

## Electronic Supplementary Material 1

### Targeted multi-analyte UHPLC-MS/MS methodology for emerging contaminants in septic tank wastewater and surface water

Maike Wilschnack<sup>a</sup>, Bess Homer<sup>b</sup>, Elise Cartmell<sup>b</sup>, Kyari Yates<sup>a</sup>, Bruce Petrie<sup>a</sup>

#### Contents

|    |                                        |    |
|----|----------------------------------------|----|
| S1 | General and chemical information ..... | 2  |
| S2 | Risk calculations .....                | 4  |
| S3 | Sludge Sampler .....                   | 5  |
| S4 | LC Solvent gradient program .....      | 5  |
| S5 | Standard preparation.....              | 5  |
| S6 | Calculation of nominal dilution .....  | 6  |
| S7 | MS/MS detection parameters .....       | 7  |
| S8 | Instrument performance .....           | 9  |
| S9 | Method performance.....                | 14 |
|    | References .....                       | 24 |

## S1 General and chemical information

Table S1: General and chemical information (Substance Class, Chemical, Cas Number, Molecular Formula, Molecular Weight, Water solubility, Log K<sub>ow</sub>, pKa, Supplier) of target analytes, ordered by substance class, alphabetically.

| Class           | Chemical                | Cas No.    | Mol. Formular                                                   | Mol. Weight (g mol <sup>-1</sup> ) | Solubility (mg L <sup>-1</sup> ) | Log K <sub>ow</sub> | pKa (most acidic)  | pKa (most basic)  | Supplier      |
|-----------------|-------------------------|------------|-----------------------------------------------------------------|------------------------------------|----------------------------------|---------------------|--------------------|-------------------|---------------|
| Anaesthetics    | Lidocaine               | 137-58-6   | C <sub>14</sub> H <sub>22</sub> N <sub>2</sub> O                | 234.34                             | 4100 <sup>a</sup>                | 2.44 <sup>a</sup>   | 13.78 <sup>e</sup> | 7.75 <sup>e</sup> | Sigma Aldrich |
| Analgesics      | 3-Methoxy-Paracetamol   | 3251-55-6  | C <sub>9</sub> H <sub>11</sub> NO <sub>3</sub>                  | 181.19                             | -                                | 0.09 <sup>c</sup>   | -                  | -                 | LGC standards |
|                 | Diclofenac              | 15307-79-6 | C <sub>14</sub> H <sub>11</sub> Cl <sub>2</sub> NO <sub>2</sub> | 296.15                             | 2.37 <sup>a</sup>                | 4.51 <sup>a</sup>   | 4 <sup>e</sup>     | -2.1 <sup>e</sup> | Sigma Aldrich |
|                 | Hydroxyibuprofen        | 51146-55-5 | C <sub>13</sub> H <sub>18</sub> O <sub>3</sub>                  | 222.28                             | -                                | 2.29 <sup>c</sup>   | 4.63 <sup>d</sup>  | -                 | Sigma Aldrich |
|                 | Ibuprofen               | 15687-27-1 | C <sub>13</sub> H <sub>18</sub> O <sub>2</sub>                  | 206.29                             | 21 <sup>a</sup>                  | 3.97 <sup>a</sup>   | 4.85 <sup>e</sup>  | -                 | Sigma Aldrich |
|                 | Ketoprofen              | 22071-15-4 | C <sub>16</sub> H <sub>14</sub> O <sub>3</sub>                  | 254.29                             | 51 <sup>a</sup>                  | 3.13 <sup>a</sup>   | 3.88 <sup>e</sup>  | -7.5 <sup>e</sup> | Sigma Aldrich |
|                 | Naproxen                | 22204-53-1 | C <sub>14</sub> H <sub>14</sub> O <sub>3</sub>                  | 230.27                             | 15.9 <sup>a</sup>                | 3.18 <sup>a</sup>   | 4.19 <sup>e</sup>  | -4.8 <sup>e</sup> | Sigma Aldrich |
|                 | Paracetamol             | 103-90-2   | C <sub>8</sub> H <sub>9</sub> NO <sub>2</sub>                   | 151.17                             | 30400 <sup>b</sup>               | 0.91 <sup>a</sup>   | 9.46 <sup>e</sup>  | -4.4 <sup>e</sup> | Sigma Aldrich |
| Antibiotics     | 3-Desmethyltrimethoprim | 27653-69-6 | C <sub>13</sub> H <sub>16</sub> N <sub>4</sub> O <sub>3</sub>   | 276.29                             | -                                | -                   | -                  | -                 | LGC standards |
|                 | α-Hydroxytrimethoprim   | 29606-06-2 | C <sub>14</sub> H <sub>18</sub> N <sub>4</sub> O <sub>4</sub>   | 306.32                             | -                                | -                   | -                  | -                 | LGC standards |
|                 | Amoxicillin             | 26787-78-0 | C <sub>16</sub> H <sub>19</sub> N <sub>3</sub> O <sub>5</sub> S | 365.4                              | 3430 <sup>b</sup>                | 0.87 <sup>a</sup>   | 3.23 <sup>e</sup>  | 7.22 <sup>e</sup> | Sigma Aldrich |
|                 | Ciprofloxacin           | 85721-33-1 | C <sub>17</sub> H <sub>18</sub> FN <sub>3</sub> O <sub>3</sub>  | 331.34                             | 11500 <sup>b</sup>               | 0.28 <sup>a</sup>   | 5.56 <sup>e</sup>  | 8.77 <sup>e</sup> | Sigma Aldrich |
|                 | Clarithromycin          | 81103-11-9 | C <sub>38</sub> H <sub>69</sub> NO <sub>13</sub>                | 747.97                             | 0.33 <sup>a</sup>                | 3.16 <sup>a</sup>   | 12.46 <sup>e</sup> | 9 <sup>e</sup>    | Sigma Aldrich |
|                 | Erythromycin            | 114-07-8   | C <sub>37</sub> H <sub>67</sub> NO <sub>13</sub>                | 733.93                             | 0.52 <sup>b</sup>                | 2.6 <sup>a</sup>    | 12.45 <sup>e</sup> | 9 <sup>e</sup>    | Sigma Aldrich |
|                 | Ofloxacin               | 82419-36-1 | C <sub>18</sub> H <sub>20</sub> FN <sub>3</sub> O <sub>4</sub>  | 361.37                             | 28300 <sup>a</sup>               | -0.39 <sup>a</sup>  | 5.35 <sup>e</sup>  | 6.72 <sup>e</sup> | Sigma Aldrich |
|                 | Sulfadiazine            | 68-35-9    | C <sub>10</sub> H <sub>10</sub> N <sub>4</sub> O <sub>2</sub> S | 250.28                             | 77 <sup>a</sup>                  | -0.09 <sup>a</sup>  | 6.99 <sup>e</sup>  | 2.01 <sup>e</sup> | Sigma Aldrich |
|                 | Sulfamethoxazole        | 723-46-6   | C <sub>10</sub> H <sub>11</sub> N <sub>3</sub> O <sub>3</sub> S | 253.28                             | 610 <sup>a</sup>                 | 0.89 <sup>a</sup>   | 6.16 <sup>e</sup>  | 1.97 <sup>e</sup> | Sigma Aldrich |
|                 | Sulfanilamide           | 63-74-1    | C <sub>6</sub> H <sub>8</sub> N <sub>2</sub> O <sub>2</sub> S   | 172.20                             | 7500 <sup>a</sup>                | -0.62 <sup>a</sup>  | 10.99 <sup>e</sup> | 2.27 <sup>e</sup> | Sigma Aldrich |
|                 | Trimethoprim            | 738-70-5   | C <sub>14</sub> H <sub>18</sub> N <sub>4</sub> O <sub>3</sub>   | 290.32                             | 400 <sup>a</sup>                 | 0.91 <sup>a</sup>   | 17.33 <sup>e</sup> | 7.16 <sup>e</sup> | Sigma Aldrich |
| Anticoagulants  | Warfarin                | 81-81-2    | C <sub>19</sub> H <sub>16</sub> O <sub>4</sub>                  | 308.33                             | 17 <sup>a</sup>                  | 2.7 <sup>a</sup>    | 5.56 <sup>e</sup>  | -6.9 <sup>e</sup> | Sigma Aldrich |
| Anticonvulsants | Carbamazepine           | 298-46-4   | C <sub>15</sub> H <sub>12</sub> N <sub>2</sub> O                | 236.28                             | 17.7 <sup>b</sup>                | 2.77 <sup>a</sup>   | 15.96 <sup>e</sup> | -3.8 <sup>e</sup> | Sigma Aldrich |

|                 |                             |             |                                                                                |        |                      |                    |                    |                    |               |
|-----------------|-----------------------------|-------------|--------------------------------------------------------------------------------|--------|----------------------|--------------------|--------------------|--------------------|---------------|
|                 | Carbamazepine-10,11-epoxide | 36507-30-9  | C <sub>15</sub> H <sub>12</sub> N <sub>2</sub> O <sub>2</sub>                  | 252.27 | -                    | 0.95 <sup>c</sup>  | 13.91 <sup>b</sup> | -0.50 <sup>b</sup> | LGC standards |
|                 | Gabapentin                  | 60142-96-3  | C <sub>9</sub> H <sub>17</sub> NO <sub>2</sub>                                 | 171.24 | 34000 <sup>c</sup>   | 1.25 <sup>a</sup>  | 4.63 <sup>e</sup>  | 9.91 <sup>e</sup>  | Sigma Aldrich |
|                 | Lamotrigine                 | 84057-84-1  | C <sub>9</sub> H <sub>7</sub> Cl <sub>2</sub> N <sub>5</sub>                   | 256.09 | 170 <sup>a</sup>     | 1.93 <sup>a</sup>  | 14.98 <sup>e</sup> | 5.58 <sup>e</sup>  | Sigma Aldrich |
|                 | Primidone                   | 125-33-7    | C <sub>12</sub> H <sub>14</sub> N <sub>2</sub> O <sub>2</sub>                  | 218.25 | 500 <sup>a</sup>     | 0.91 <sup>a</sup>  | 11.5 <sup>e</sup>  | -6.2 <sup>e</sup>  | Sigma Aldrich |
| Antidepressants | Citalopram                  | 59729-32-7  | C <sub>20</sub> H <sub>21</sub> FN <sub>2</sub> O                              | 324.40 | 31.1 <sup>b</sup>    | 3.76 <sup>a</sup>  | -                  | 9.78 <sup>a</sup>  | Sigma Aldrich |
|                 | Desmethylcitalopram         | 144025-14-9 | C <sub>19</sub> H <sub>19</sub> FN <sub>2</sub> O                              | 310.37 | -                    | 3.53 <sup>c</sup>  | -                  | 10.54 <sup>d</sup> | LGC standards |
|                 | Desmethylvenlafaxine        | 93413-62-8  | C <sub>16</sub> H <sub>25</sub> NO <sub>2</sub>                                | 263.38 | -                    | 2.69 <sup>d</sup>  | 10.04 <sup>b</sup> | 9.33 <sup>b</sup>  | Sigma Aldrich |
|                 | Fluoxetine                  | 56296-78-7  | C <sub>17</sub> H <sub>18</sub> F <sub>3</sub> NO                              | 309.33 | 60.3 <sup>b</sup>    | 4.05 <sup>a</sup>  | -                  | 9.8 <sup>e</sup>   | LGC standards |
|                 | Venlafaxine                 | 99300-78-4  | C <sub>17</sub> H <sub>27</sub> N <sub>1</sub> O <sub>2</sub>                  | 277.41 | 267 <sup>b</sup>     | 3.28 <sup>b</sup>  | 14.42 <sup>e</sup> | 8.91 <sup>e</sup>  | Sigma Aldrich |
| Anti-diabetics  | Guanylurea                  | 207300-86-5 | C <sub>2</sub> H <sub>6</sub> N <sub>4</sub> O                                 | 102.10 | -                    | -3.57 <sup>c</sup> | -                  | -                  | Sigma Aldrich |
|                 | Metformin                   | 1115-70-4   | C <sub>4</sub> H <sub>11</sub> N <sub>5</sub>                                  | 129.17 | 1000000 <sup>b</sup> | -2.6 <sup>a</sup>  | -                  | 12.4 <sup>a</sup>  | Sigma Aldrich |
| Anti-fungals    | Climbazole                  | 38083-17-9  | C <sub>15</sub> H <sub>17</sub> ClN <sub>2</sub> O <sub>2</sub>                | 292.76 | -                    | 3.76 <sup>c</sup>  | 18.87 <sup>e</sup> | 6.49 <sup>e</sup>  | TCI           |
|                 | Clotrimazole                | 23593-75-1  | C <sub>22</sub> H <sub>17</sub> ClN <sub>2</sub>                               | 344.84 | 0.49 <sup>a</sup>    | 6.1 <sup>a</sup>   | -                  | 6.26 <sup>e</sup>  | Sigma Aldrich |
|                 | Fluconazole                 | 86386-73-4  | C <sub>13</sub> H <sub>12</sub> F <sub>2</sub> N <sub>6</sub> O                | 306.27 | -                    | 0.5 <sup>a</sup>   | 12.68 <sup>e</sup> | 2.3 <sup>e</sup>   | TCI           |
|                 | Miconazole                  | 22916-47-8  | C <sub>18</sub> H <sub>14</sub> Cl <sub>4</sub> N <sub>2</sub> O               | 416.13 | -                    | 6.25 <sup>c</sup>  | -                  | 6.48 <sup>e</sup>  | Sigma Aldrich |
| Anti-helmintics | Mebendazole                 | 31431-39-7  | C <sub>16</sub> H <sub>13</sub> N <sub>3</sub> O <sub>3</sub>                  | 295.29 | 71.3 <sup>a</sup>    | 2.83 <sup>a</sup>  | 8.44 <sup>e</sup>  | 3.93 <sup>e</sup>  | TCI           |
| Antihistamines  | Cetirizine                  | 83881-52-1  | C <sub>21</sub> H <sub>25</sub> ClN <sub>2</sub> O <sub>3</sub>                | 388.9  | 101 <sup>a</sup>     | 2.8 <sup>a</sup>   | 3.59 <sup>e</sup>  | 7.42 <sup>b</sup>  | Sigma Aldrich |
|                 | Chlorpheniramine            | 113-92-8    | C <sub>16</sub> H <sub>19</sub> ClN <sub>2</sub>                               | 274.79 | 5500 <sup>a</sup>    | 3.38 <sup>a</sup>  | -                  | 9.13 <sup>a</sup>  | Sigma Aldrich |
|                 | Fexofenadine                | 153439-40-8 | C <sub>32</sub> H <sub>39</sub> NO <sub>4</sub>                                | 501.67 | 0.02 <sup>b</sup>    | 2.94 <sup>e</sup>  | 4.04 <sup>e</sup>  | 9.01 <sup>e</sup>  | Sigma Aldrich |
| Anti-pruritic   | Crotamiton                  | 483-63-6    | C <sub>13</sub> H <sub>17</sub> NO                                             | 203.28 | -                    | 2.9 <sup>d</sup>   | -                  | -0.6 <sup>e</sup>  | Sigma Aldrich |
| Antiulcer       | 4-Hydroxyomeprazole         | 301669-82-9 | C <sub>16</sub> H <sub>17</sub> N <sub>3</sub> O <sub>3</sub> S                | 331.40 | -                    | 1.93 <sup>c</sup>  | 9.68 <sup>d</sup>  | 3.93 <sup>d</sup>  | LGC standards |
|                 | Lansoprazole                | 103577-45-3 | C <sub>16</sub> H <sub>14</sub> F <sub>3</sub> N <sub>3</sub> O <sub>2</sub> S | 369.36 | 0.97 <sup>a</sup>    | 3.68 <sup>c</sup>  | 9.35 <sup>e</sup>  | 4.16 <sup>e</sup>  | TCI           |
|                 | Omeprazole                  | 73590-58-6  | C <sub>17</sub> H <sub>19</sub> N <sub>3</sub> O <sub>3</sub> S                | 345.52 | 359 <sup>a</sup>     | 2.23 <sup>a</sup>  | 9.29 <sup>e</sup>  | 4.77 <sup>e</sup>  | Sigma Aldrich |
|                 | Ranitidine                  | 66357-59-3  | C <sub>13</sub> H <sub>22</sub> N <sub>4</sub> O <sub>3</sub> S                | 314.41 | 24700 <sup>b</sup>   | 0.2 <sup>a</sup>   | -                  | 8.2 <sup>a</sup>   | Sigma Aldrich |
| Benzodiazepines | Lorazepam                   | 846-49-1    | C <sub>15</sub> H <sub>10</sub> Cl <sub>2</sub> N <sub>2</sub> O <sub>2</sub>  | 321.16 | 80 <sup>a</sup>      | 2.39 <sup>a</sup>  | 10.61 <sup>e</sup> | -2.2 <sup>e</sup>  | Sigma Aldrich |
|                 | Oxazepam                    | 604-75-1    | C <sub>15</sub> H <sub>11</sub> ClN <sub>2</sub> O <sub>2</sub>                | 286.71 | 179 <sup>b</sup>     | 2.24 <sup>a</sup>  | 10.61 <sup>e</sup> | -1.5 <sup>e</sup>  | Sigma Aldrich |

|                             |                            |             |                                                                                |        |                      |                   |                    |                    |               |
|-----------------------------|----------------------------|-------------|--------------------------------------------------------------------------------|--------|----------------------|-------------------|--------------------|--------------------|---------------|
|                             | Temazepam                  | 846-50-4    | C <sub>16</sub> H <sub>13</sub> ClN <sub>2</sub> O <sub>2</sub>                | 300.75 | 164 <sup>a</sup>     | 2.19 <sup>a</sup> | 10.68 <sup>e</sup> | -1.4 <sup>e</sup>  | Sigma Aldrich |
| Betablockers                | Acebutolol                 | 34381-68-5  | C <sub>18</sub> H <sub>28</sub> N <sub>2</sub> O <sub>4</sub>                  | 336.43 | 259 <sup>a</sup>     | 1.71 <sup>a</sup> | 13.91 <sup>e</sup> | 9.65 <sup>e</sup>  | Sigma Aldrich |
|                             | Atenolol                   | 29122-68-7  | C <sub>14</sub> H <sub>22</sub> N <sub>2</sub> O <sub>3</sub>                  | 266.34 | 13300 <sup>a</sup>   | 0.16 <sup>a</sup> | 14.08 <sup>e</sup> | 9.67 <sup>e</sup>  | Sigma Aldrich |
|                             | Bisoprolol                 | 104344-23-2 | C <sub>18</sub> H <sub>31</sub> NO <sub>4</sub>                                | 325.44 | 2240 <sup>b</sup>    | 2.2 <sup>a</sup>  | 14.09 <sup>e</sup> | 9.67 <sup>e</sup>  | Sigma Aldrich |
|                             | Metoprolol                 | 56392-17-7  | C <sub>15</sub> H <sub>25</sub> NO <sub>3</sub>                                | 267.37 | 4770 <sup>b</sup>    | 2.15 <sup>a</sup> | 14.09 <sup>e</sup> | 9.67 <sup>e</sup>  | Sigma Aldrich |
|                             | Propranolol                | 318-98-9    | C <sub>16</sub> H <sub>21</sub> NO <sub>2</sub>                                | 259.35 | 228 <sup>e</sup>     | 3.48 <sup>a</sup> | 14.09 <sup>e</sup> | 9.67 <sup>e</sup>  | Sigma Aldrich |
|                             | Salbutamol                 | 18559-94-9  | C <sub>13</sub> H <sub>21</sub> NO <sub>3</sub>                                | 239.31 | 14100 <sup>a</sup>   | 1.4 <sup>a</sup>  | 10.12 <sup>e</sup> | 9.4 <sup>e</sup>   | Sigma Aldrich |
|                             | Sotalol                    | 959-24-0    | C <sub>12</sub> H <sub>20</sub> N <sub>2</sub> O <sub>3</sub> S                | 272.36 | -                    | 0.24 <sup>c</sup> | 10.07 <sup>e</sup> | 9.43 <sup>e</sup>  | Sigma Aldrich |
| Chemotherapeutic            | Ifosfamide                 | 3778-73-2   | C <sub>7</sub> H <sub>15</sub> Cl <sub>2</sub> N <sub>2</sub> O <sub>2</sub> P | 261.09 | 3780 <sup>a</sup>    | 0.86 <sup>a</sup> | 14.64 <sup>e</sup> | -                  | Sigma Aldrich |
| Cocciostat                  | Clopidol                   | 2971-90-6   | C <sub>7</sub> H <sub>7</sub> Cl <sub>2</sub> NO                               | 192.04 | -                    | 2.1 <sup>c</sup>  | 10.77 <sup>d</sup> | -                  | Sigma Aldrich |
| Hormones                    | 17β-Estradiol (E2)         | 50-28-2     | C <sub>18</sub> H <sub>24</sub> O <sub>2</sub>                                 | 272.39 | 3.6 <sup>a</sup>     | 4.01 <sup>a</sup> | 10.33 <sup>e</sup> | -0.88 <sup>e</sup> | Sigma Aldrich |
|                             | 17α-Ethinylestradiol (EE2) | 57-63-6     | C <sub>20</sub> H <sub>24</sub> O <sub>2</sub>                                 | 296.41 | 11.3 <sup>a</sup>    | 3.67 <sup>a</sup> | 10.33 <sup>e</sup> | -1.7 <sup>e</sup>  | Sigma Aldrich |
|                             | Estriol (E3)               | 50-27-1     | C <sub>18</sub> H <sub>24</sub> O <sub>3</sub>                                 | 288.38 | -                    | 2.45 <sup>a</sup> | 10.33 <sup>e</sup> | -3.2 <sup>e</sup>  | Sigma Aldrich |
|                             | Estrone (E1)               | 53-16-7     | C <sub>18</sub> H <sub>22</sub> O <sub>2</sub>                                 | 270.37 | 0.76 <sup>a</sup>    | 2.6 <sup>a</sup>  | 10.33 <sup>e</sup> | -5.4 <sup>e</sup>  | Sigma Aldrich |
|                             | Norethisterone             | 68-22-4     | C <sub>20</sub> H <sub>26</sub> O <sub>2</sub>                                 | 298.42 | 7.04 <sup>c</sup>    | 2.97 <sup>c</sup> | 17.59 <sup>e</sup> | -1.7 <sup>e</sup>  | Sigma Aldrich |
| Lipid regulators            | Atorvastatin               | 344423-98-9 | C <sub>33</sub> H <sub>35</sub> FN <sub>2</sub> O <sub>5</sub>                 | 558.65 | 0.00112 <sup>b</sup> | 6.36 <sup>a</sup> | 4.31 <sup>e</sup>  | -2.7 <sup>e</sup>  | Sigma Aldrich |
|                             | Bezafibrate                | 41859-67-0  | C <sub>19</sub> H <sub>20</sub> ClNO <sub>4</sub>                              | 361.83 | 1.2 <sup>b</sup>     | 4.25 <sup>b</sup> | 3.83 <sup>e</sup>  | -0.84 <sup>e</sup> | Sigma Aldrich |
|                             | Gemfibrozil                | 25812-30-0  | C <sub>15</sub> H <sub>22</sub> O <sub>3</sub>                                 | 250.33 | 4.96 <sup>b</sup>    | 4.39 <sup>a</sup> | 4.42 <sup>e</sup>  | -4.8 <sup>e</sup>  | Sigma Aldrich |
| Wastewater discharge marker | Caffeine                   | 58-05-02    | C <sub>8</sub> H <sub>10</sub> N <sub>4</sub> O <sub>2</sub>                   | 194.19 | 21700 <sup>a</sup>   | 0.16 <sup>b</sup> | -                  | 0.52 <sup>b</sup>  | Sigma Aldrich |
|                             | Cotinine                   | 486-56-6    | C <sub>10</sub> H <sub>12</sub> N <sub>2</sub> O                               | 176.22 | 999000 <sup>b</sup>  | 1.37 <sup>d</sup> | -                  | 4.79 <sup>d</sup>  | Sigma Aldrich |
| X-ray contrast              | Amidotrizoic acid          | 117-96-4    | C <sub>11</sub> H <sub>9</sub> I <sub>3</sub> N <sub>2</sub> O <sub>4</sub>    | 613.91 | -                    | 3.3 <sup>a</sup>  | 2.17 <sup>e</sup>  | -4.2 <sup>ei</sup> | Sigma Aldrich |

<sup>a</sup> Drugbank [1], <sup>b</sup> Proctor et al., 2019 [2], <sup>c</sup> ChemSpider [3], <sup>d</sup> ChEMBL [4], <sup>e</sup> Drugbank using ChemAxon [1]

Table S2: CAS Number and supplier for deuterated pharmaceutical standards.

| <b>Compound</b>                                        | <b>CAS</b>   | <b>supplier</b> |
|--------------------------------------------------------|--------------|-----------------|
| (±)-Acebutolol-d <sub>5</sub> hydrochloride            | 1189500-68-2 | TRC             |
| (±)-Atenolol-d <sub>7</sub>                            | 1202864-50-3 | Analab          |
| (±)-Bisoprolol-d <sub>5</sub>                          | 1189881-87-5 | TRC             |
| (±)-Chlorpheniramine-d <sub>6</sub> solution           | 129806-45-7  | Sigma Aldrich   |
| (±)-Citalopram-d <sub>6</sub> solution                 | 1190003-26-9 | Sigma Aldrich   |
| (±)-Cotinine-d <sub>3</sub> solution                   | 110952-70-0  | Sigma Aldrich   |
| (±)-Fluoxetine-d <sub>6</sub> solution                 | 1173020-43-3 | Sigma Aldrich   |
| (±)-Ibuprofen-d <sub>3</sub>                           | 121662-14-4  | Sigma Aldrich   |
| (±)-Metoprolol-d <sub>7</sub> (+)-tartrate             | 2378803-75-7 | Sigma Aldrich   |
| (±)-Naproxen-d <sub>3</sub>                            | 958293-79-3  | Sigma Aldrich   |
| (±)-Propranolol-d <sub>7</sub> solution                | 1613439-56-7 | Sigma Aldrich   |
| (±)-Salbutamol-d <sub>3</sub>                          | 1219798-60-3 | LGC standards   |
| (±)-Sotalol-d <sub>6</sub> hydrochloride               | 1246820-85-8 | LGC standards   |
| (±)-Temazepam-d <sub>5</sub> solution                  | 136765-51-0  | Sigma Aldrich   |
| (±)-Venlafaxine-D <sub>6</sub> solution                | 1062606-12-5 | Sigma Aldrich   |
| 17β-Estradiol-d <sub>4</sub>                           | 66789-03-5   | LGC standards   |
| Acetaminophen-d <sub>4</sub>                           | 64315-36-2   | Sigma Aldrich   |
| Caffeine- <sup>13</sup> C                              | 202282-98-2  | Sigma Aldrich   |
| Carbamazepine-10,11-epoxide-d <sub>10</sub>            | 1219804-16-6 | LGC standards   |
| Carbamazepine-d <sub>10</sub> solution                 | 132183-78-9  | Sigma Aldrich   |
| Clarithromycin-N-methyl- <sup>13</sup> C, <sub>3</sub> | 78088-19-4   | LGC standards   |
| Ciprofloxacin-d <sub>8</sub> Oxalate                   | 1246819-94-2 | TRC             |
| Estrone-d <sub>4</sub>                                 | 53866-34-5   | Sigma Aldrich   |
| Metformin-d <sub>6</sub> HCl                           | 1185166-01-1 | LGC standards   |
| Ofloxacin-d <sub>3</sub>                               | 1173147-91-5 | Sigma Aldrich   |
| (±)-Oxazepam-d <sub>5</sub> solution                   | 65854-78-6   | Sigma Aldrich   |
| Primidone-d <sub>5</sub>                               | 73738-06-4   | Supelco         |

## S2 Risk calculations

Risk calculations were performed for pharmaceuticals with annual prescription rates over 1,000,000 per item in Scotland in 2019 [5]. The risk quotient (RQ) is calculated by dividing the predicted and measured environmental concentrations in the UK by the predicted no effect concentration (PNEC). The PNEC was obtained from the lowest found value in the literature. A substance was included as a target analyte, if  $RQ > 1$  [6,7].

### S3 Sludge Sampler

Figure S1: Costume-made polyvinylchloride sludge sampler in its broken down form (a) and in use (b). For sampling, the sludge sampler was inserted into the septic tank until it reached the bottom, pulled up a few centimetres, and closed by pulling the cord up. It was then lifted up and the sludge was collected into a polypropylene bottle.

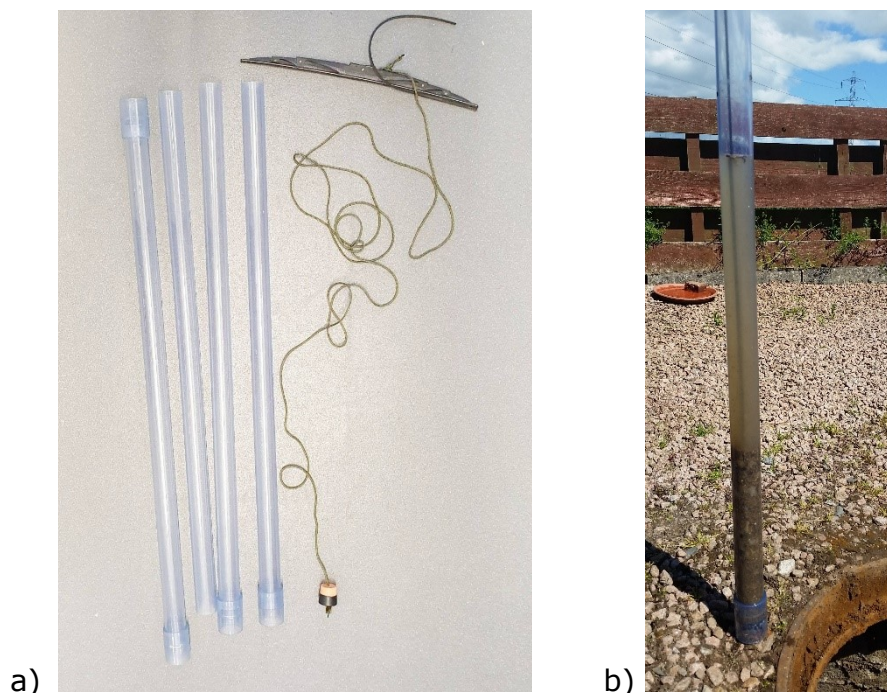

### S4 LC Solvent gradient program

Table S3: LC solvent gradient program, mobile phase A: Water with additives, mobile phase B: methanol with additives. Additives were 5mM ammonium formate and 0.1% formic acid in the positive method, and 0.1mM ammonium fluoride in the negative method. The total run time was 14min for the positive, and 12min for the negative method.

| Time /min | % A      |          |
|-----------|----------|----------|
|           | positive | negative |
| 0         | 95       | 95       |
| 0.5       | 95       | 95       |
| 8         |          | 20       |
| 9         | 20       | 20       |
| 9.1       |          | 95       |
| 11        | 20       | 95       |
| 11.1      | 95       | 95       |
| 12        | 95       | 95       |
| 14        | 95       |          |

### S5 Standard preparation

The standards were mainly purchased in solid form. Stock solutions were prepared by dissolving 10 mg of the accurately weighted standard in HPLC grade methanol (MeOH, Fisher Scientific) at a concentration of 1 mg mL<sup>-1</sup>. The amoxicillin solution was prepared in water, due to their limited solubility, sulfadiazine was dissolved in acetonitrile (ACN, Fisher scientific), guanylurea sulphate was dissolved in MeOH/water (1/1, v/v), and mebendazole in

ACN/formic acid (9/1, v/v) [1]. The deuterated standards were mainly purchased as solutions. Otherwise, stock solutions were prepared as described for the standards. From the stock solutions, three separate mixtures of deuterated ECs ( $2 \mu\text{g mL}^{-1}$ ), ECs except antibiotics ( $2 \mu\text{g mL}^{-1}$ ), and antibiotics only ( $2 \mu\text{g mL}^{-1}$ ) were prepared in MeOH. These were then further diluted to working solutions. Working solutions and antibiotic mixtures were prepared every 3 months. All solutions were stored in the dark at  $-20^{\circ}\text{C}$ .

Table S4: Relevant concentrations in the method validation.  $50 \mu\text{L}$  internal standard mixture ( $100 \mu\text{g L}^{-1}$ ) and  $50 \mu\text{L}$  standard working solutions of different concentrations were added to  $0.4 \text{ mL}$  direct injection sample,  $50 \text{ mL}$  influent and effluent,  $100 \text{ mL}$  river water, and  $0.1 \text{ g}$  sludge.

| <b>c (<math>\mu\text{g L}^{-1}</math>) standard working solution</b> | <b>c (<math>\mu\text{g L}^{-1}</math>) in water for direct injection</b> | <b>c (<math>\mu\text{g L}^{-1}</math>) before SPE (effluent, influent)</b> | <b>c (<math>\mu\text{g L}^{-1}</math>) before SPE (river water)</b> | <b>c (<math>\text{ng g}^{-1}</math>) in sludge</b> | <b>c (<math>\mu\text{g L}^{-1}</math>) in vial after extraction and in direct injection</b> |
|----------------------------------------------------------------------|--------------------------------------------------------------------------|----------------------------------------------------------------------------|---------------------------------------------------------------------|----------------------------------------------------|---------------------------------------------------------------------------------------------|
| 0                                                                    | 0                                                                        | 0                                                                          | 0                                                                   | 0                                                  | 0                                                                                           |
| 10                                                                   | 1.25                                                                     | 0.01                                                                       | 0.005                                                               |                                                    | 1                                                                                           |
| 100                                                                  | 12.5                                                                     | 0.1                                                                        | 0.05                                                                | 50                                                 | 10                                                                                          |
| 500                                                                  | 62.5                                                                     | 0.5                                                                        | 0.25                                                                | 250                                                | 50                                                                                          |
| 1000                                                                 |                                                                          |                                                                            |                                                                     | 500                                                | 100                                                                                         |

## S6 Calculation of nominal dilution

The nominal dilution of the septic tank discharge into the river was calculated from the flow of the receiving river per day ( $f_{\text{river}}$ ) and the calculated flow of the septic tank effluent per day ( $f_{\text{ST}}$ ) following equation S1.

$$dilution = \frac{(f_{\text{river}} - f_{\text{ST}})}{f_{\text{ST}}} \quad (S1)$$

The flow of the septic tank effluent per day was calculated by multiplying the population equivalents (PE) by the average daily discharge per person per day ( $0.7252 \text{ m}^3/\text{day}$ ) (equation S2).[8]

$$f_{\text{ST}} = PE \cdot 0.7252 \text{ m}^3 \text{ day}^{-1} \quad (S2)$$

## S7 MS/MS detection parameters

Table S5: MS/MS detection parameters for studied compounds (precursor ion, cone voltage (CV), quantifier and qualifier ions with collision energies (CE)), sorted according to retention times (RT).

| RT /min             | Analyte                                     | Precursor Ion /m/z | CV /V | Quantifier Ion | CE /eV | Qualifier Ion | CE /eV |
|---------------------|---------------------------------------------|--------------------|-------|----------------|--------|---------------|--------|
| Positive Ionisation |                                             |                    |       |                |        |               |        |
| 0.7                 | Guanylurea                                  | 103.1              | 16    | 60.1           | 10     | 86.1          | 8      |
| 0.8                 | Metformin                                   | 130.2              | 27    | 60.1           | 12     | 71.2          | 17     |
| 0.8                 | Metformin-d <sub>6</sub>                    | 136.3              | 28    | 60.1           | 13     | -             | -      |
| 1.2                 | Sulfanilamide                               | 173.1              | 27    | 92.1           | 16     | 108.1         | 14     |
| 1.7                 | Cotinine-d <sub>3</sub>                     | 180.2              | 13    | 80.1           | 22     | -             | -      |
| 1.7                 | Cotinine                                    | 177.1              | 34    | 80.1           | 19     | 98.1          | 21     |
| 2.0                 | Amidotrizoic acid                           | 631.9              | 29    | 361.2          | 26     | 233.2         | 46     |
| 2.2                 | Amoxicillin                                 | 366.1              | 29    | 114.1          | 19     | 208.2         | 12     |
| 2.2                 | Sotalol-d <sub>6</sub>                      | 279.2              | 24    | 214.1          | 17     | -             | -      |
| 2.3                 | Sotalol                                     | 273.2              | 25    | 133.2          | 28     | 213.2         | 17     |
| 2.3                 | Paracetamol-d <sub>4</sub>                  | 156.1              | 23    | 114.1          | 16     | -             | -      |
| 2.4                 | Paracetamol                                 | 151.9              | 26    | 110.0          | 16     | 92.9          | 24     |
| 2.5                 | Salbutamol-d <sub>3</sub>                   | 243.0              | 21    | 151.2          | 21     | -             | -      |
| 2.5                 | Salbutamol                                  | 240.2              | 27    | 148.1          | 20     | 166.1         | 12     |
| 2.5                 | Ranitidine                                  | 315.1              | 31    | 176.1          | 16     | 130.1         | 25     |
| 2.5                 | Atenolol-d <sub>7</sub>                     | 274.2              | 23    | 145.1          | 24     | -             | -      |
| 2.5                 | Atenolol                                    | 267.3              | 38    | 145.1          | 30     | 190.1         | 16     |
| 2.6                 | Sulfadiazine                                | 251.1              | 18    | 156.1          | 15     | 92.1          | 26     |
| 2.9                 | 3-Methoxy Paracetamol                       | 182.2              | 22    | 108.1          | 16     | 80.1          | 29     |
| 3.0                 | 3-Desmethyl Trimethoprim                    | 277.2              | 30    | 261.2          | 25     | 123.2         | 35     |
| 3.1                 | alpha-Hydroxy Trimethoprim                  | 307.2              | 22    | 289.2          | 14     | 274.2         | 20     |
| 3.3                 | Clopidol                                    | 192.1              | 27    | 101.1          | 24     | 87.1          | 28     |
| 3.3                 | Gabapentin                                  | 172.2              | 23    | 154.2          | 12     | 137.2         | 15     |
| 3.6                 | Trimethoprim                                | 291.2              | 23    | 230.1          | 15     | 261.2         | 23     |
| 3.6                 | Caffeine                                    | 195.1              | 16    | 138.1          | 17     | 110.1         | 23     |
| 3.6                 | Caffeine- <sup>13</sup> C                   | 198.1              | 31    | 140.1          | 19     | -             | -      |
| 3.7                 | Ofloxacin-d <sub>8</sub>                    | 365.1              | 30    | 261.2          | 27     | -             | -      |
| 3.7                 | Ofloxacin                                   | 362.2              | 30    | 318.2          | 18     | 261.2         | 25     |
| 3.9                 | Ciprofloxacin                               | 332.1              | 17    | 314.2          | 21     | 288.2         | 17     |
| 4.0                 | Lidocaine                                   | 235.2              | 29    | 86.1           | 17     | -             | -      |
| 4.1                 | Sulfamethoxazole                            | 254.1              | 32    | 156.1          | 16     | 92.2          | 28     |
| 4.2                 | Ciprofloxacin-d <sub>8</sub>                | 340.1              | 24    | 322.2          | 21     | -             | -      |
| 4.5                 | Desmethylvenlafaxine                        | 264.3              | 29    | 246.3          | 12     | 107.1         | 30     |
| 4.7                 | Acebutolol                                  | 337.3              | 20    | 116.2          | 18     | 319.3         | 16     |
| 4.7                 | Acebutolol-d <sub>5</sub>                   | 342.3              | 19    | 121.2          | 23     | -             | -      |
| 4.7                 | Lamotrigine                                 | 256.1              | 24    | 211.1          | 25     | 187.1         | 27     |
| 4.8                 | Primidone-d <sub>5</sub>                    | 227.1              | 14    | 164.2          | 12     | -             | -      |
| 4.8                 | Metoprolol                                  | 268.2              | 30    | 159.1          | 22     | 191.2         | 17     |
| 4.8                 | Metoprolol-d <sub>7</sub>                   | 275.3              | 29    | 123.2          | 18     | -             | -      |
| 4.8                 | Primidone                                   | 219.1              | 28    | 162.1          | 12     | 91.1          | 25     |
| 4.8                 | Fluconazole                                 | 307.1              | 29    | 238.2          | 15     | 220.1         | 18     |
| 5.4                 | Ifosfamide                                  | 261.1              | 15    | 92.1           | 23     | 154.0         | 18     |
| 5.5                 | 4-Hydroxy Omeprazole                        | 316.2              | 22    | 168.1          | 24     | 149.2         | 24     |
| 5.8                 | Carbamazepine-10,11-epoxide-d <sub>10</sub> | 263.1              | 26    | 190.2          | 22     | -             | -      |



|                     |                                                |       |    |       |    |       |    |
|---------------------|------------------------------------------------|-------|----|-------|----|-------|----|
| 5.8                 | Chlorpheniramine                               | 275.2 | 30 | 230.1 | 18 | 167.1 | 43 |
| 5.8                 | Chlorpheniramine-d <sub>6</sub>                | 281.1 | 26 | 230.1 | 16 | -     | -  |
| 5.8                 | Venlafaxine-d <sub>6</sub>                     | 284.3 | 34 | 266.3 | 12 | -     | -  |
| 5.9                 | Bisoprolol-d <sub>5</sub>                      | 331.2 | 23 | 121.2 | 17 | -     | -  |
| 5.9                 | Carbamazepine-10,11-epoxide                    | 253.1 | 20 | 180.1 | 20 | 210.2 | 14 |
| 5.9                 | Venlafaxine                                    | 278.3 | 36 | 260.3 | 10 | 215.2 | 16 |
| 5.9                 | Bisoprolol                                     | 326.3 | 20 | 116.2 | 16 | 222.2 | 10 |
| 6.0                 | Propranolol-d <sub>7</sub>                     | 267.1 | 22 | 189.2 | 18 | -     | -  |
| 6.1                 | Propranolol                                    | 260.2 | 50 | 116.1 | 16 | 183.1 | 18 |
| 6.2                 | Citalopram                                     | 325.2 | 24 | 262.2 | 20 | 116.1 | 25 |
| 6.2                 | Citalopram-d <sub>6</sub>                      | 331.2 | 24 | 109.1 | 31 | -     | -  |
| 6.2                 | Desmethylcitalopram                            | 311.2 | 22 | 109.1 | 20 | 262.2 | 17 |
| 6.4                 | Omeprazole                                     | 346.2 | 21 | 198.1 | 11 | 180.1 | 23 |
| 6.8                 | Hydroxyibuprofen                               | 240.2 | 25 | 205.2 | 12 | 163.2 | 16 |
| 6.9                 | Carbamazepine-d <sub>10</sub>                  | 247.1 | 33 | 204.2 | 20 | -     | -  |
| 6.9                 | Carbamazepine                                  | 237.2 | 33 | 194.2 | 18 | 179.2 | 32 |
| 7.1                 | Mebendazole                                    | 296.1 | 19 | 264.2 | 23 | 105.1 | 33 |
| 7.3                 | Fexofenadine                                   | 502.4 | 37 | 466.5 | 25 | 171.2 | 35 |
| 7.3                 | Lansoprazole                                   | 370.1 | 29 | 252.1 | 11 | 119.2 | 20 |
| 7.4                 | Erythromycin                                   | 734.5 | 37 | 158.2 | 30 | 576.4 | 19 |
| 7.5                 | Oxazepam-d <sub>5</sub>                        | 292.1 | 26 | 246.2 | 25 | -     | -  |
| 7.5                 | Oxazepam                                       | 287.1 | 26 | 241.1 | 25 | 269.1 | 17 |
| 7.6                 | Lorazepam                                      | 321.1 | 25 | 275.1 | 22 | 303.1 | 16 |
| 7.7                 | Fluoxetine-d <sub>6</sub>                      | 316.1 | 19 | 154.2 | 9  | -     | -  |
| 7.7                 | Climbazole                                     | 293.1 | 23 | 69.2  | 21 | 41.2  | 26 |
| 7.7                 | Fluoxetine                                     | 310.2 | 34 | 44.1  | 10 | 148.1 | 10 |
| 7.8                 | Temazepam-d <sub>5</sub>                       | 306.1 | 24 | 260.2 | 21 | -     | -  |
| 7.8                 | Temazepam                                      | 301.1 | 24 | 255.2 | 21 | 283.2 | 14 |
| 7.8                 | Ketoprofen                                     | 255.2 | 50 | 209.2 | 15 | 105.1 | 22 |
| 7.8                 | Cetirizine                                     | 389.2 | 30 | 201.2 | 22 | 166.1 | 40 |
| 8.1                 | Clarithromycin                                 | 748.5 | 29 | 158.2 | 32 | 558.4 | 24 |
| 8.1                 | Clarithromycin- <sup>13</sup> C-d <sub>3</sub> | 752.6 | 25 | 162.2 | 29 | -     | -  |
| 8.1                 | N-Desmethylclarithromycin                      | 734.6 | 28 | 144.2 | 30 | 576.5 | 18 |
| 8.1                 | Norethisterone                                 | 299.2 | 16 | 231.2 | 18 | 109.2 | 26 |
| 8.1                 | Bezafibrate                                    | 362.1 | 25 | 139.1 | 25 | 316.2 | 14 |
| 8.1                 | Clotrimazole                                   | 277.1 | 27 | 165.2 | 20 | 242.2 | 20 |
| 8.2                 | Crotamiton                                     | 204.2 | 27 | 69.1  | 22 | 136.2 | 17 |
| 8.2                 | Warfarin                                       | 309.1 | 32 | 163.1 | 14 | 251.2 | 19 |
| 9.0                 | Atorvastatin-d <sub>5</sub>                    | 564.4 | 27 | 445.4 | 22 | -     | -  |
| 9.0                 | Atorvastatin                                   | 559.2 | 28 | 440.3 | 23 | 250.2 | 43 |
| 9.3                 | Miconazole                                     | 417.0 | 18 | 159.1 | 30 | 161.1 | 28 |
| Negative ionisation |                                                |       |    |       |    |       |    |
| 5.7                 | Estriol                                        | 287.1 | 36 | 171.1 | 37 | 145.1 | 39 |
| 6.0                 | Naproxen                                       | 229.0 | 9  | 170.1 | 14 | 185.1 | 5  |
| 7.0                 | Diclofenac                                     | 294.1 | 21 | 250   | 10 | 178.1 | 29 |
| 7.4                 | E2-d <sub>4</sub>                              | 275.2 | 35 | 147.3 | 37 | 160.2 | 30 |
| 7.4                 | E2                                             | 271.2 | 25 | 145.1 | 40 | 183.2 | 40 |
| 7.5                 | Estrone                                        | 269.1 | 35 | 145.1 | 38 | 159.2 | 34 |
| 7.5                 | Estrone-d <sub>4</sub>                         | 273.2 | 39 | 147.1 | 36 | 160.1 | 36 |
| 7.5                 | EE2                                            | 295.1 | 20 | 159.1 | 36 | 145.1 | 38 |

|     |                          |       |    |       |    |   |   |
|-----|--------------------------|-------|----|-------|----|---|---|
| 7.6 | Ibuprofen                | 205.1 | 12 | 161.3 | 12 | - | - |
| 7.6 | Ibuprofen-d <sub>3</sub> | 208.1 | 13 | 164.2 | 8  | - | - |
| 8.7 | Gemfibrozil              | 249.0 | 13 | 121.1 | 20 | - | - |

## S8 Instrument performance

For each analyte, the ratios of the peak area against the peak area of the internal standard (area ratio, *ar*), were plotted against the standard concentrations (*c*) above the IQL. A linear regression model (equation S3) was fitted, where *m* was the slope of the calibration line and *b* was the intercept with the y-axis.

$$ar = m \cdot c + b \quad (S3)$$

The coefficient of determination ( $R^2$ ) was calculated.

Table S6: Instrument performance information for analytes with the selected internal standard (IS), correlation coefficient ( $R^2$ ), linear concentration range, and instrument detection (IDL) and quantification limits (IQL), ordered by method and retention time.

| RT  | compound                       | IS                         | $R^2$ | cali range<br>( $\mu\text{g L}^{-1}$ ) | IDL<br>( $\mu\text{g L}^{-1}$ ) | IQL<br>( $\mu\text{g L}^{-1}$ ) |
|-----|--------------------------------|----------------------------|-------|----------------------------------------|---------------------------------|---------------------------------|
| 0.7 | Guanylurea                     | Salbutamol-d <sub>3</sub>  | 0.997 | 0.5 – 100                              | 0.25                            | 0.5                             |
| 0.8 | Metformin                      | Metformin-d <sub>6</sub>   | 0.997 | 0.1 – 500                              | 0.05                            | 0.1                             |
| 1.2 | Sulfanilamide                  | Primidone-d <sub>5</sub>   | 0.999 | 1 – 100                                | 0.5                             | 1                               |
| 1.7 | Cotinine                       | Cotinine-d <sub>3</sub>    | 0.992 | 0.05 – 100                             | 0.005                           | 0.02                            |
| 2.0 | Amidotrizoic acid              | Salbutamol-d <sub>3</sub>  | 1.000 | 0.5 – 100                              | 0.1                             | 0.3                             |
| 2.2 | Amoxicillin                    | Paracetamol-d <sub>4</sub> | 0.998 | 1 – 100                                | 0.8                             | 1                               |
| 2.3 | Sotalol                        | Sotalol-d <sub>6</sub>     | 1.000 | 0.05 – 100                             | 0.005                           | 0.04                            |
| 2.4 | Paracetamol                    | Paracetamol-d <sub>4</sub> | 0.998 | 1 – 500                                | 0.1                             | 0.2                             |
| 2.5 | Salbutamol                     | Salbutamol-d <sub>3</sub>  | 1.000 | 0.05 – 100                             | 0.005                           | 0.04                            |
| 2.5 | Ranitidine                     | Paracetamol-d <sub>4</sub> | 0.998 | 0.1 – 100                              | 0.05                            | 0.1                             |
| 2.5 | Atenolol                       | Atenolol-d <sub>7</sub>    | 1.000 | 0.1 – 100                              | 0.03                            | 0.1                             |
| 2.6 | Sulfadiazine                   | Caffeine- <sup>13</sup> C  | 0.997 | 0.5 – 100                              | 0.02                            | 0.07                            |
| 2.9 | 3-Methoxy Paracetamol          | Cotinine-d <sub>3</sub>    | 1.000 | 0.1 – 100                              | 0.03                            | 0.1                             |
| 3.0 | 3-Desmethyl Trimethoprim       | Cotinine-d <sup>3</sup>    | 0.999 | 0.05 – 100                             | 0.01                            | 0.02                            |
| 3.1 | $\alpha$ -Hydroxy Trimethoprim | Caffeine- <sup>13</sup> C  | 0.994 | 0.1 – 100                              | 0.05                            | 0.1                             |
| 3.3 | Clopidol                       | Caffeine- <sup>13</sup> C  | 0.999 | 5 – 100                                | 0.3                             | 1.1                             |
| 3.3 | Gabapentin                     | Caffeine- <sup>13</sup> C  | 0.997 | 1 – 100                                | 0.5                             | 1                               |
| 3.6 | Trimethoprim                   | Paracetamol-d <sub>4</sub> | 0.999 | 0.05 – 100                             | 0.01                            | 0.05                            |
| 3.6 | Caffeine                       | Caffeine- <sup>13</sup> C  | 0.995 | 1 – 100                                | 0.08                            | 0.3                             |

|     |                             |                                                |       |            |       |       |
|-----|-----------------------------|------------------------------------------------|-------|------------|-------|-------|
| 3.7 | Ofloxacin                   | Ofloxacin-d <sub>8</sub>                       | 0.991 | 0.1 – 100  | 0.05  | 0.1   |
| 3.9 | Ciprofloxacin               | Ofloxacin-d <sub>8</sub>                       | 0.991 | 0.05 – 100 | 0.02  | 0.05  |
| 4.0 | Lidocaine                   | Carbamazepine-d <sub>10</sub>                  | 0.999 | 0.05 – 100 | 0.002 | 0.005 |
| 4.1 | Sulfamethoxazole            | Caffeine- <sup>13</sup> C                      | 0.997 | 0.1 – 100  | 0.05  | 0.1   |
| 4.5 | Desmethylvenlafaxine        | Venlafaxine-d <sub>6</sub>                     | 1.000 | 0.05 – 100 | 0.005 | 0.01  |
| 4.7 | Acebutolol                  | Acebutolol-d <sub>5</sub>                      | 1.000 | 0.05 – 100 | 0.005 | 0.01  |
| 4.7 | Lamotrigine                 | Carbamazepine-d <sub>10</sub>                  | 1.000 | 0.05 – 100 | 0.002 | 0.005 |
| 4.8 | Metoprolol                  | Metoprolol-d <sub>7</sub>                      | 0.998 | 0.5 – 100  | 0.1   | 0.5   |
| 4.8 | Primidone                   | Primidone-d <sub>5</sub>                       | 0.999 | 0.5 – 100  | 0.1   | 0.2   |
| 4.9 | Fluconazole                 | Caffeine- <sup>13</sup> C                      | 0.997 | 0.1 – 100  | 0.03  | 0.1   |
| 5.4 | Ifosfamide                  | Venlafaxine-d <sub>6</sub>                     | 0.999 | 0.5 – 100  | 0.05  | 0.25  |
| 5.5 | 4-Hydroxy Omeprazole        | Carbamazepine-d <sub>10</sub>                  | 1.000 | 0.1 – 100  | 0.01  | 0.1   |
| 5.9 | Chlorpheniramine            | Chlorpheniramine-d <sub>6</sub>                | 0.999 | 0.1 – 100  | 0.05  | 0.1   |
| 5.9 | Carbamazepine-10,11-epoxide | Carbamazepine-10,11-epoxide-d <sub>10</sub>    | 0.998 | 0.5 – 100  | 0.03  | 0.1   |
| 5.9 | Venlafaxine                 | Venlafaxine-d <sub>6</sub>                     | 1.000 | 0.5 – 100  | 0.1   | 0.25  |
| 5.9 | Bisoprolol                  | Bisoprolol-d <sub>5</sub>                      | 1.000 | 0.05 – 100 | 0.01  | 0.03  |
| 6.1 | Propranolol                 | Propranolol-d <sub>7</sub>                     | 1.000 | 0.5 – 100  | blank | 0.1   |
| 6.2 | Citalopram                  | Citalopram-d <sub>6</sub>                      | 0.999 | 0.1 – 100  | 0.02  | 0.1   |
| 6.2 | Desmethylcitalopram         | Citalopram-d <sub>6</sub>                      | 0.998 | 0.1 – 100  | 0.03  | 0.1   |
| 6.5 | Omeprazole                  | Caffeine- <sup>13</sup> C                      | 0.995 | 1 – 100    | 0.7   | 1     |
| 6.8 | Hydroxyibuprofen            | Paracetamol-d <sub>4</sub>                     | 0.999 | 1 – 100    | 0.5   | 1     |
| 6.9 | Carbamazepine               | Carbamazepine-d <sub>10</sub>                  | 0.999 | 0.05 – 100 | 0.005 | 0.02  |
| 7.1 | Mebendazole                 | Carbamazepine-d <sub>10</sub>                  | 0.999 | 5 – 100    | blank | 5     |
| 7.3 | Fexofenadine                | Venlafaxine-d <sub>6</sub>                     | 1.000 | 0.5 – 100  | 0.03  | 0.11  |
| 7.4 | Erythromycin                | Clarithromycin- <sup>13</sup> C-d <sub>3</sub> | 1.000 | 0.05 – 50  | 0.01  | 0.05  |
| 7.5 | Lansoprazole                | Citalopram-d <sub>6</sub>                      | 0.998 | 1 – 100    | 0.05  | 1     |
| 7.6 | Oxazepam                    | Oxazepam-d <sub>5</sub>                        | 0.998 | 0.5 – 100  | 0.2   | 0.5   |
| 7.6 | Lorazepam                   | Temazepam-d <sub>5</sub>                       | 0.999 | 0.5 – 100  | 0.1   | 0.5   |
| 7.7 | Climbazole                  | Clarithromycin- <sup>13</sup> C-d <sub>3</sub> | 0.942 | 0.5 – 100  | 0.1   | 0.25  |
| 7.7 | Fluoxetine                  | Fluoxetine-d <sub>6</sub>                      | 0.999 | 0.1 – 100  | 0.03  | 0.1   |
| 7.8 | Temazepam                   | Temazepam-d <sub>5</sub>                       | 1.000 | 0.1 – 100  | 0.04  | 0.1   |
| 7.8 | Ketoprofen                  | Temazepam-d <sub>5</sub>                       | 0.999 | 0.5 – 100  | 0.15  | 0.5   |
| 7.9 | Cetirizine                  | Metoprolol-d <sub>7</sub>                      | 0.998 | 0.5 – 100  | 0.06  | 0.2   |
| 8.1 | Clarithromycin              | Clarithromycin- <sup>13</sup> C-d <sub>3</sub> | 0.999 | 0.05 – 100 | 0.005 | 0.01  |
| 8.1 | Norethisterone              | Carbamazepine-d <sub>10</sub>                  | 1.000 | 0.5 – 100  | 0.15  | 0.5   |
| 8.1 | Bezafibrate                 | Carbamazepine-d <sub>10</sub>                  | 1.000 | 0.5 – 100  | 0.15  | 0.5   |
| 8.2 | Crotamiton                  | Carbamazepine-d <sub>10</sub>                  | 0.999 | 0.05 – 100 | 0.002 | 0.005 |
| 8.2 | Clotrimazole                | Clarithromycin- <sup>13</sup> C-d <sub>3</sub> | 0.978 | 0.5 – 100  | 0.05  | 0.1   |
| 8.2 | Warfarin                    | Carbamazepine-d <sub>10</sub>                  | 1.000 | 0.1 – 100  | 0.05  | 0.1   |

|     |                      |                              |       |            |       |       |
|-----|----------------------|------------------------------|-------|------------|-------|-------|
| 9.0 | Atorvastatin         | peak area                    | 1.000 | 0.05 – 100 | 0.002 | 0.005 |
| 9.4 | Miconazole           | peak area                    | 0.938 | 0.5 – 100  | blank | 0.5   |
| 5.6 | Estriol              | Estrone-d <sub>4</sub>       | 1.000 | 0.5 – 100  | 0.1   | 0.5   |
| 6.0 | Naproxen             | Ibuprofen-d <sub>3</sub>     | 0.996 | 1 – 100    | 0.05  | 1     |
| 7.1 | Diclofenac           | Ibuprofen-d <sub>3</sub>     | 0.994 | 0.5 – 100  | blank | 0.5   |
| 7.4 | 17β-Estradiol        | 17β-Estradiol-d <sub>4</sub> | 1.000 | 0.5 – 100  | 0.1   | 0.3   |
| 7.5 | Estrone              | Estrone-d <sub>4</sub>       | 1.000 | 0.5 – 100  | 0.1   | 0.3   |
| 7.5 | 17α-Ethinylestradiol | 17β-Estradiol-d <sub>4</sub> | 0.999 | 1 – 100    | 0.5   | 1     |
| 7.5 | Ibuprofen            | Ibuprofen-d <sub>3</sub>     | 0.994 | 0.5 - 500  | 0.1   | 0.5   |
| 8.7 | Gemfibrozil          | Ibuprofen-d <sub>3</sub>     | 0.995 | 0.1 – 100  | 0.05  | 0.1   |

For precision, the relative standard deviation of the replicates was calculated. Accuracies were determined from the percentage deviation of the standards from the calibration curve.

Therefore, concentrations ( $c_{calc}$ ) of the 1, 10, and 50  $\mu\text{g L}^{-1}$  standards were calculated from the area ratios ( $ar$ ) following subtraction of the calculated concentration ( $c_0$ ) of the blank using equation S4.

$$c_{calc} = \frac{(ar - b)}{m} - c_0 \quad (S4)$$

Accuracy was then calculated from the ratio of the calculated and standard concentration ( $c_{std}$ ) according to equation S5.

$$accuracy = \frac{c_{calc}}{c_{std}} \cdot 100 \% \quad (S5)$$

Table S7: Intra- and Inter-day accuracy and precision (both in %) with p-values (two sample t-test with rstatix in R) for the repeated injection of 1, 10, and 50 µg L<sup>-1</sup> standards.

| RT  | Analyte                  | Accuracy (/%)           |                          |                          |                         |                          |                          |         | Precision (/%)          |                          |                          |                         |                          |                          |         |
|-----|--------------------------|-------------------------|--------------------------|--------------------------|-------------------------|--------------------------|--------------------------|---------|-------------------------|--------------------------|--------------------------|-------------------------|--------------------------|--------------------------|---------|
|     |                          | Intra day               |                          |                          | Inter day               |                          |                          | p-value | Intra day               |                          |                          | Inter day               |                          |                          | p-value |
|     |                          | 1<br>µg L <sup>-1</sup> | 10<br>µg L <sup>-1</sup> | 50<br>µg L <sup>-1</sup> | 1<br>µg L <sup>-1</sup> | 10<br>µg L <sup>-1</sup> | 50<br>µg L <sup>-1</sup> |         | 1<br>µg L <sup>-1</sup> | 10<br>µg L <sup>-1</sup> | 50<br>µg L <sup>-1</sup> | 1<br>µg L <sup>-1</sup> | 10<br>µg L <sup>-1</sup> | 50<br>µg L <sup>-1</sup> |         |
| 0.7 | Guanylurea               | 105                     | 101                      | 89                       | 120                     | 104                      | 106                      | 0.173   | 7                       | 2                        | 3                        | 8                       | 1                        | 5                        | 0.752   |
| 0.8 | Metformin                | 90                      | 98                       | 106                      | 90                      | 100                      | 108                      | 0.891   | 9                       | 1                        | 4                        | 3                       | 1                        | 5                        | 0.532   |
| 1.2 | Sulfanilamide            | 76                      | 91                       | 104                      | 98                      | 99                       | 97                       | 0.428   | 10                      | 8                        | 4                        | 4                       | 6                        | 9                        | 0.734   |
| 1.7 | Cotinine                 | 102                     | 100                      | 106                      | 98                      | 99                       | 97                       | 0.100   | 3                       | 4                        | 7                        | 7                       | 6                        | 4                        | 0.513   |
| 2.0 | Amidotrizoic acid        | 100                     | 102                      | 99                       | 94                      | 100                      | 105                      | 0.794   | 13                      | 7                        | 6                        | 5                       | 11                       | 11                       | 0.858   |
| 2.2 | Amoxicillin              | 99                      | 110                      | 100                      | 118                     | 100                      | 113                      | 0.336   | 9                       | 10                       | 4                        | 20                      | 15                       | 10                       | 0.117   |
| 2.3 | Sotalol                  | 100                     | 100                      | 98                       | 108                     | 90                       | 99                       | 0.961   | 7                       | 2                        | 2                        | 2                       | 8                        | 3                        | 0.843   |
| 2.4 | Paracetamol              | 84                      | 112                      | 107                      | 101                     | 110                      | 111                      | 0.559   | 5                       | 6                        | 2                        | 5                       | 8                        | 4                        | 0.334   |
| 2.5 | Salbutamol               | 100                     | 101                      | 96                       | 97                      | 96                       | 91                       | 0.160   | 9                       | 1                        | 4                        | 9                       | 5                        | 7                        | 0.461   |
| 2.5 | Ranitidine               | 95                      | 110                      | 102                      | 74                      | 89                       | 90                       | 0.054   | 15                      | 10                       | 14                       | 9                       | 9                        | 14                       | 0.395   |
| 2.5 | Atenolol                 | 100                     | 101                      | 100                      | 107                     | 96                       | 98                       | 0.932   | 8                       | 7                        | 6                        | 12                      | 2                        | 2                        | 0.730   |
| 2.6 | Sulfadiazine             | 106                     | 101                      | 90                       | 93                      | 92                       | 84                       | 0.199   | 7                       | 4                        | 3                        | 7                       | 4                        | 6                        | 0.491   |
| 2.9 | 3-Methoxy Paracetamol    | 122                     | 98                       | 100                      | 124                     | 97                       | 110                      | 0.722   | 6                       | 6                        | 2                        | 4                       | 8                        | 5                        | 0.755   |
| 3.0 | 3-Desmethyl Trimethoprim | 101                     | 96                       | 94                       | 116                     | 101                      | 109                      | 0.098   | 7                       | 4                        | 5                        | 4                       | 11                       | 5                        | 0.602   |
| 3.1 | α-Hydroxy Trimethoprim   | 107                     | 101                      | 92                       | 111                     | 108                      | 97                       | 0.441   | 3                       | 8                        | 5                        | 16                      | 7                        | 1                        | 0.609   |
| 3.3 | Clopidol                 | <sup>a</sup>            | 104                      | 94                       | <sup>a</sup>            | 108                      | 96                       | 0.711   | <sup>a</sup>            | 6                        | 8                        | <sup>a</sup>            | 6                        | 7                        | 0.674   |
| 3.3 | Gabapentin               | 119                     | 95                       | 92                       | 98                      | 99                       | 97                       | 0.694   | 5                       | 8                        | 5                        | 11                      | 7                        | 1                        | 0.868   |
| 3.6 | Trimethoprim             | 102                     | 106                      | 95                       | 126                     | 112                      | 112                      | 0.053   | 6                       | 6                        | 5                        | 3                       | 5                        | 6                        | 0.240   |
| 3.6 | Caffeine                 | 79                      | 93                       | 93                       | 94                      | 116                      | 97                       | 0.186   | 15                      | 6                        | 5                        | 15                      | 5                        | 5                        | 0.921   |
| 3.7 | Ofloxacin                | 80                      | 98                       | 100                      | 94                      | 93                       | 96                       | 0.825   | 9                       | 8                        | 5                        | 6                       | 4                        | 29                       | 0.536   |
| 3.9 | Ciprofloxacin            | 97                      | 97                       | 99                       | 104                     | 109                      | 132                      | 0.185   | 6                       | 7                        | 10                       | 19                      | 5                        | 21                       | 0.280   |

|     |                             |     |     |     |     |     |     |       |    |    |    |    |    |    |       |
|-----|-----------------------------|-----|-----|-----|-----|-----|-----|-------|----|----|----|----|----|----|-------|
| 4.0 | Lidocaine                   | 100 | 100 | 101 | 95  | 93  | 93  | 0.004 | 6  | 1  | 4  | 16 | 10 | 4  | 0.206 |
| 4.1 | Sulfamethoxazole            | 101 | 106 | 100 | 95  | 102 | 100 | 0.273 | 12 | 8  | 5  | 4  | 11 | 6  | 0.719 |
| 4.5 | Desmethylvenlafaxine        | 85  | 99  | 100 | 97  | 100 | 94  | 0.650 | 6  | 3  | 5  | 10 | 6  | 2  | 0.632 |
| 4.7 | Acebutolol                  | 99  | 100 | 94  | 99  | 96  | 97  | 0.750 | 8  | 5  | 4  | 4  | 4  | 1  | 0.205 |
| 4.7 | Lamotrigine                 | 112 | 103 | 97  | 113 | 102 | 98  | 0.906 | 7  | 5  | 7  | 9  | 8  | 5  | 0.458 |
| 4.8 | Primidone                   | 102 | 99  | 104 | 104 | 108 | 106 | 0.100 | 6  | 4  | 8  | 3  | 5  | 3  | 0.225 |
| 4.8 | Metoprolol                  | 111 | 100 | 104 | 99  | 95  | 100 | 0.136 | 7  | 3  | 3  | 3  | 3  | 7  | 0.936 |
| 4.9 | Fluconazole                 | 102 | 100 | 94  | 98  | 94  | 94  | 0.367 | 6  | 7  | 2  | 7  | 5  | 2  | 0.954 |
| 5.4 | Ifosfamide                  | 90  | 99  | 93  | 95  | 93  | 88  | 0.615 | 9  | 1  | 6  | 2  | 8  | 7  | 0.843 |
| 5.5 | 4-Hydroxy Omeprazole        | 112 | 101 | 98  | 108 | 96  | 95  | 0.521 | 6  | 6  | 6  | 1  | 1  | 4  | 0.062 |
| 5.9 | Chlorpheniramine            | 72  | 108 | 102 | 68  | 112 | 97  | 0.939 | 1  | 5  | 5  | 6  | 1  | 2  | 0.830 |
| 5.9 | Carbamazepine-10,11-epoxide | 106 | 101 | 95  | 96  | 101 | 96  | 0.513 | 12 | 6  | 7  | 10 | 1  | 6  | 0.488 |
| 5.9 | Venlafaxine                 | 97  | 102 | 101 | 94  | 103 | 98  | 0.590 | 7  | 6  | 4  | 5  | 5  | 5  | 0.625 |
| 5.9 | Bisoprolol                  | 100 | 101 | 100 | 100 | 100 | 103 | 0.426 | 2  | 4  | 6  | 6  | 5  | 4  | 0.423 |
| 6.1 | Propranolol                 | 100 | 100 | 98  | 101 | 111 | 94  | 0.626 | 7  | 10 | 5  | 4  | 7  | 3  | 0.185 |
| 6.2 | Citalopram                  | 98  | 98  | 96  | 94  | 101 | 101 | 0.634 | 5  | 4  | 5  | 7  | 3  | 3  | 0.907 |
| 6.2 | Desmethylcitalopram         | 99  | 97  | 95  | 107 | 107 | 103 | 0.007 | 6  | 4  | 9  | 6  | 10 | 7  | 0.615 |
| 6.5 | Omeprazole                  | a   | 99  | 103 | a   | 106 | 98  | 0.773 | 18 | 21 | 16 | a  | 13 | 21 | 0.752 |
| 6.8 | Hydroxyibuprofen            | 98  | 99  | 94  | 97  | 105 | 108 | 0.178 | 23 | 5  | 7  | 18 | 5  | 4  | 0.722 |
| 6.9 | Carbamazepine               | 102 | 100 | 99  | 100 | 96  | 99  | 0.288 | 4  | 6  | 5  | 4  | 3  | 5  | 0.132 |
| 7.1 | Mebendazole                 | a   | 100 | 96  | 86  | 85  | 90  | 0.046 | 2  | 4  | 5  | 10 | 5  | 6  | 0.189 |
| 7.3 | Fexofenadine                | 91  | 106 | 102 | 93  | 115 | 108 | 0.503 | 6  | 3  | 5  | 10 | 3  | 6  | 0.410 |
| 7.4 | Erythromycin                | 110 | 99  | b   | 105 | 87  | b   | 0.523 | 8  | 9  | 2  | 2  | 2  | 9  | 0.498 |
| 7.5 | Lansoprazole                | 125 | 100 | 101 | 136 | 121 | 84  | 0.794 | 28 | 11 | 7  | 36 | 14 | 30 | 0.287 |
| 7.6 | Oxazepam                    | 120 | 99  | 100 | 102 | 98  | 95  | 0.376 | 6  | 7  | 9  | 7  | 13 | 2  | 1.000 |

|     |                               |     |     |     |     |     |     |       |    |    |    |    |    |    |       |
|-----|-------------------------------|-----|-----|-----|-----|-----|-----|-------|----|----|----|----|----|----|-------|
| 7.6 | Lorazepam                     | 108 | 104 | 112 | 103 | 108 | 101 | 0.233 | 9  | 10 | 13 | 5  | 1  | 8  | 0.085 |
| 7.7 | Climbazole                    | a   | 82  | 110 | a   | 116 | 106 | 0.451 | 10 | 1  | 7  | 4  | 1  | 5  | 0.479 |
| 7.7 | Fluoxetine                    | 96  | 107 | 93  | 80  | 105 | 92  | 0.514 | 5  | 5  | 4  | 2  | 4  | 5  | 0.520 |
| 7.8 | Temazepam                     | 107 | 103 | 102 | 104 | 106 | 103 | 0.639 | 6  | 4  | 8  | 9  | 5  | 6  | 0.717 |
| 7.8 | Ketoprofen                    | 93  | 102 | 104 | 84  | 97  | 91  | 0.169 | 5  | 5  | 10 | 12 | 11 | 1  | 0.786 |
| 7.9 | Cetirizine                    | 82  | 100 | 107 | 126 | 219 | 235 | 0.098 | 7  | 4  | 6  | 3  | 3  | 7  | 0.405 |
| 8.1 | Clarithromycin                | 94  | 98  | 87  | 97  | 98  | 89  | 0.748 | 5  | 2  | 6  | 2  | 4  | 2  | 0.282 |
| 8.1 | Norethisterone                | 116 | 101 | 99  | 105 | 105 | 106 | 0.967 | 15 | 4  | 3  | 16 | 9  | 12 | 0.299 |
| 8.1 | Bezafibrate                   | 115 | 100 | 98  | 97  | 94  | 92  | 0.194 | 7  | 3  | 6  | 2  | 7  | 3  | 0.541 |
| 8.2 | Crotamiton                    | 99  | 100 | 97  | 82  | 92  | 91  | 0.062 | 9  | 2  | 4  | 9  | 7  | 4  | 0.573 |
| 8.2 | Clotrimazole                  | a   | 75  | 103 | a   | 111 | 83  | 0.728 | 7  | 8  | 8  | 3  | 2  | 5  | 0.036 |
| 8.2 | Warfarin                      | 108 | 101 | 99  | 97  | 101 | 95  | 0.220 | 6  | 7  | 4  | 7  | 2  | 6  | 0.697 |
| 9.0 | Atorvastatin                  | 101 | 103 | 81  | 117 | 112 | 94  | 0.255 | 11 | 7  | 5  | 15 | 1  | 9  | 0.881 |
| 9.4 | Miconazole                    | 112 | 102 | 88  | 87  | 91  | 92  | 0.265 | 7  | 8  | 13 | 5  | 12 | 2  | 0.535 |
| 5.6 | Estriol                       | 101 | 102 | 98  | 76  | 83  | 85  | 0.012 | 14 | 3  | 4  | 12 | 6  | 3  | 0.947 |
| 6.0 | Naproxen                      | 115 | 96  | 104 | 106 | 106 | 111 | 0.703 | 4  | 8  | 6  | 5  | 2  | 15 | 0.798 |
| 7.1 | Diclofenac                    | 110 | 110 | 106 | 104 | 100 | 100 | 0.018 | 4  | 10 | 9  | 4  | 13 | 12 | 0.571 |
| 7.4 | 17 $\beta$ -Estradiol         | 101 | 105 | 102 | 105 | 101 | 102 | 0.846 | 15 | 6  | 6  | 17 | 13 | 12 | 0.222 |
| 7.5 | Estrone                       | 109 | 98  | 101 | 103 | 105 | 106 | 0.662 | 8  | 6  | 4  | 3  | 2  | 6  | 0.313 |
| 7.5 | 17 $\alpha$ -Ethinylestradiol | 112 | 109 | 99  | 115 | 101 | 108 | 0.834 | 4  | 3  | 5  | 2  | 13 | 5  | 0.570 |
| 7.5 | Ibuprofen                     | a   | 106 | 98  | a   | 112 | 92  | 0.981 | 9  | 2  | 11 | 10 | 11 | 10 | 0.829 |
| 8.7 | Gemfibrozil                   | 86  | 102 | 98  | 89  | 91  | 91  | 0.389 | 6  | 5  | 6  | 10 | 15 | 13 | 0.034 |

a)  $c \leq IQL$ , b)  $c \geq$  calibration range

## S9 Method performance

Table S8: Absolute recoveries (REC) and relative standard deviation (sd) (both in %) from spiked wastewater (c = 10ng/mL) using polytetrafluoroethylene (PTFE), cellulose acetate (CA), polyvinylidene fluoride hydrophilic (PVDF-HL), and polyvinylidene fluoride hydrophobic (PVDF) syringe filters (n = 3). Sorted according to method and retention times.

| RT<br>/min | Analyte                     | PTFE |    | CA  |    | PVDF |    | PVDF-HL |    |
|------------|-----------------------------|------|----|-----|----|------|----|---------|----|
|            |                             | REC  | sd | REC | sd | REC  | sd | REC     | sd |
| positive   |                             |      |    |     |    |      |    |         |    |
| 0.7        | Guanylurea                  | 99   | 3  | 101 | 3  | 95   | 3  | 91      | 2  |
| 0.8        | Metformin                   | 97   | 4  | 97  | 4  | 88   | 4  | 88      | 2  |
| 1.2        | Sulfanilamide               | 91   | 7  | 93  | 6  | 87   | 5  | 82      | 9  |
| 1.7        | Cotinine                    | 102  | 4  | 100 | 3  | 94   | 4  | 93      | 5  |
| 2.2        | Amoxicillin                 | 120  | 7  | 42  | 19 | 82   | 9  | 83      | 6  |
| 2.3        | Sotalol                     | 103  | 4  | 96  | 4  | 86   | 6  | 86      | 3  |
| 2.4        | Paracetamol                 | 100  | 3  | 98  | 2  | 104  | 2  | 101     | 3  |
| 2.5        | Salbutamol                  | 102  | 5  | 98  | 5  | 86   | 2  | 86      | 2  |
| 2.5        | Ranitidine                  | 99   | 4  | 99  | 7  | 85   | 4  | 83      | 4  |
| 2.5        | Atenolol                    | 96   | 5  | 95  | 7  | 85   | 6  | 83      | 3  |
| 2.6        | Sulfadiazine                | 99   | 2  | 95  | 6  | 84   | 4  | 79      | 3  |
| 3.3        | Gabapentin                  | 103  | 5  | 100 | 6  | 88   | 2  | 88      | 5  |
| 3.6        | Trimethoprim                | 102  | 3  | 97  | 3  | 88   | 3  | 87      | 4  |
| 3.6        | Caffeine                    | 95   | 9  | 91  | 8  | 88   | 10 | 89      | 11 |
| 3.7        | Ofloxacin                   | 100  | 4  | 97  | 7  | 79   | 3  | 83      | 1  |
| 3.9        | Ciprofloxacin               | 99   | 2  | 93  | 7  | 84   | 3  | 79      | 3  |
| 4.0        | Lidocaine                   | 94   | 5  | 94  | 6  | 83   | 3  | 85      | 3  |
| 4.1        | Sulfamethoxazole            | 98   | 4  | 97  | 7  | 88   | 3  | 87      | 3  |
| 4.5        | Desmethylvenlafaxine        | 96   | 5  | 93  | 7  | 84   | 2  | 84      | 3  |
| 4.7        | Acebutolol                  | 92   | 5  | 91  | 6  | 73   | 3  | 84      | 4  |
| 4.7        | Lamotrigine                 | 100  | 6  | 94  | 5  | 87   | 4  | 85      | 4  |
| 4.8        | Metoprolol                  | 97   | 3  | 95  | 4  | 81   | 6  | 86      | 4  |
| 4.8        | Primidone                   | 106  | 4  | 100 | 4  | 91   | 4  | 87      | 6  |
| 4.8        | Fluconazole                 | 97   | 5  | 98  | 6  | 86   | 5  | 85      | 3  |
| 5.4        | Ifosfamide                  | 99   | 5  | 93  | 8  | 89   | 5  | 86      | 5  |
| 5.8        | Chlorpheniramine            | 59   | 3  | 73  | 4  | 12   | 2  | 72      | 7  |
| 5.9        | Carbamazepine-10,11-epoxide | 101  | 4  | 96  | 6  | 88   | 3  | 88      | 4  |
| 5.9        | Venlafaxine                 | 76   | 10 | 87  | 11 | 59   | 3  | 79      | 3  |
| 5.9        | Bisoprolol                  | 88   | 7  | 90  | 6  | 67   | 4  | 83      | 3  |
| 6.1        | Propranolol                 | 55   | 3  | 52  | 5  | 42   | 4  | 57      | 7  |
| 6.2        | Citalopram                  | 27   | 47 | 39  | 3  | 6    | 15 | 49      | 6  |
| 6.2        | Desmethylcitalopram         | 24   | 48 | 35  | 61 | 16   | 13 | 38      | 7  |
| 6.4        | Omeprazole                  | 98   | 3  | 91  | 6  | 87   | 2  | 87      | 4  |
| 6.8        | Hydroxyibuprofen            | 100  | 3  | 95  | 6  | 91   | 2  | 90      | 3  |
| 6.9        | Carbamazepine               | 100  | 3  | 94  | 6  | 87   | 2  | 87      | 3  |
| 7.1        | Mebendazole                 | 104  | 4  | 67  | 13 | 89   | 2  | 89      | 3  |



|          |                |     |    |     |    |     |    |     |    |
|----------|----------------|-----|----|-----|----|-----|----|-----|----|
| 7.3      | Fexofenadine   | 88  | 7  | 93  | 7  | 59  | 4  | 85  | 5  |
| 7.4      | Erythromycin   | 56  | 34 | 82  | 16 | 18  | 12 | 79  | 5  |
| 7.5      | Oxazepam       | 94  | 4  | 85  | 6  | 82  | 6  | 83  | 5  |
| 7.6      | Lorazepam      | 96  | 3  | 79  | 6  | 81  | 5  | 82  | 3  |
| 7.7      | Climbazole     | 81  | 6  | 58  | 15 | 69  | 4  | 68  | 5  |
| 7.7      | Fluoxetine     | 5   | 13 | 26  | 13 | 7   | 22 | 11  | 12 |
| 7.8      | Temazepam      | 96  | 3  | 88  | 4  | 80  | 2  | 84  | 4  |
| 7.8      | Ketoprofen     | 106 | 4  | 103 | 4  | 95  | 2  | 91  | 4  |
| 7.8      | Cetirizine     | 50  | 15 | 52  | 4  | 31  | 3  | 56  | 8  |
| 8.1      | Clarithromycin | 27  | 54 | 61  | 26 | 6   | 12 | 65  | 6  |
| 8.1      | Norethisterone | 102 | 3  | 76  | 5  | 85  | 4  | 84  | 3  |
| 8.1      | Bezafibrate    | 101 | 9  | 98  | 4  | 89  | 15 | 89  | 22 |
| 8.1      | Clotrimazole   | 28  | 39 | 13  | 59 | 9   | 14 | 10  | 31 |
| 8.2      | Warfarin       | 100 | 7  | 96  | 4  | 93  | 11 | 90  | 12 |
| 9.0      | Atorvastatin   | 88  | 4  | 65  | 6  | 71  | 3  | 75  | 2  |
| 9.3      | Miconazole     | 8   | 28 | 11  | 22 | 4   | 7  | 11  | 28 |
| negative |                |     |    |     |    |     |    |     |    |
| 5.7      | Estriol        | 119 | 14 | 112 | 4  | 107 | 19 | 110 | 25 |
| 6.0      | Naproxen       | 101 | 13 | 103 | 7  | 91  | 9  | 91  | 23 |
| 7.0      | Diclofenac     | 96  | 9  | 98  | 5  | 91  | 15 | 101 | 16 |
| 7.4      | E2             | 101 | 12 | 63  | 7  | 97  | 22 | 80  | 14 |
| 7.5      | Estrone        | 95  | 12 | 37  | 6  | 84  | 17 | 71  | 9  |
| 7.6      | Ibuprofen      | 98  | 11 | 99  | 5  | 91  | 12 | 92  | 19 |
| 8.7      | Gemfibrozil    | 97  | 9  | 96  | 3  | 94  | 13 | 90  | 12 |

Table S9: Absolute recoveries (Rec) and relative standard deviation (sd) (both in %) for each analyte in influent, effluent, river water, and sludge (n = 3). If not otherwise stated all spiked samples were used in the calculation.

| RT<br>/min | Analyte                  | Direct inject.  |                 |                  |                 |       |                 | SPE             |    |                 |    |                |    | Sludge         |    |
|------------|--------------------------|-----------------|-----------------|------------------|-----------------|-------|-----------------|-----------------|----|-----------------|----|----------------|----|----------------|----|
|            |                          | Influent        |                 | Effluent         |                 | River |                 | Influent        |    | Effluent        |    | River          |    |                |    |
|            |                          | Rec             | sd              | Rec              | sd              | Rec   | sd              | Rec             | sd | Rec             | sd | Rec            | sd | Rec            | sd |
| 0.7        | Guanylurea               | 52              | 7               | 55               | 6               | 184   | 13              | 4               | 2  | 3 <sup>a</sup>  | 4  | 2              | 1  | <sup>d</sup>   | -  |
| 0.8        | Metformin                | 161             | 74 <sup>b</sup> | 192 <sup>a</sup> | 60 <sup>b</sup> | 186   | 86 <sup>b</sup> | 16              | 2  | <sup>b</sup>    | -  | 4 <sup>c</sup> | 3  | <sup>d</sup>   | -  |
| 0.8        | Metformin-d <sub>6</sub> | 209             | 7               | 164              | 8               | 241   | 11              | 9               | 5  | 7               | 4  | 3              | 2  | <sup>d</sup>   | -  |
| 1.2        | Sulfanilamide            | 84 <sup>a</sup> | 9               | 77               | 6               | 98    | 7               | 11 <sup>a</sup> | 2  | 15 <sup>a</sup> | 7  | 16             | 14 | 5 <sup>d</sup> | 5  |
| 1.7        | Cotinine-d <sub>3</sub>  | 96              | 8               | 100              | 6               | 98    | 8               | 89              | 11 | 82              | 4  | 91             | 12 | 108            | 30 |
| 1.7        | Cotinine                 | 94              | 3               | 103              | 9               | 95    | 5               | 80              | 6  | <sup>b</sup>    | -  | 90             | 10 | 100            | 14 |

|     |                            |                 |    |                  |    |                 |    |                 |    |                 |    |                 |    |                  |    |
|-----|----------------------------|-----------------|----|------------------|----|-----------------|----|-----------------|----|-----------------|----|-----------------|----|------------------|----|
| 2.0 | Amidotrizoic acid          | 95              | 8  | 98               | 11 | 92              | 7  | 0               | 0  | 1               | 0  | 0               | 0  | 0 <sup>d</sup>   | -  |
| 2.2 | Amoxicillin                | 87              | 7  | 96               | 9  | 98              | 11 | 11 <sup>a</sup> | 9  | 31 <sup>a</sup> | 6  | 1               | 1  | 0 <sup>d</sup>   | -  |
| 2.2 | Sotalol-d <sub>6</sub>     | 98              | 4  | 106              | 6  | 98              | 4  | 87              | 5  | 89              | 4  | 90              | 9  | 23               | 5  |
| 2.3 | Sotalol                    | 101             | 6  | 99               | 3  | 99              | 7  | 79              | 10 | 78              | 3  | 87              | 13 | 28               | 3  |
| 2.3 | Paracetamol-d <sub>4</sub> | 84              | 5  | 96               | 3  | 87              | 7  | 58              | 2  | 40              | 2  | 51              | 12 | 33               | 2  |
| 2.4 | Paracetamol                | 86 <sup>a</sup> | 5  | b                | -  | 90 <sup>a</sup> | 9  | b               | -  | b               | -  | 33 <sup>a</sup> | 11 | b                | -  |
| 2.5 | Salbutamol-d <sub>3</sub>  | 96              | 6  | 104              | 5  | 92              | 3  | 92              | 7  | 95              | 6  | 79              | 7  | 17               | 8  |
| 2.5 | Salbutamol                 | 101             | 4  | 107              | 6  | 101             | 6  | 112             | 18 | 88              | 4  | 79              | 7  | 13               | 3  |
| 2.5 | Ranitidine                 | 121             | 35 | 142              | 18 | 118             | 37 | 59              | 11 | 98              | 19 | 85              | 21 | 2 <sup>d</sup>   | 1  |
| 2.5 | Atenolol-d <sub>7</sub>    | 97              | 5  | 103              | 6  | 98              | 7  | 100             | 4  | 93              | 6  | 91              | 7  | 31               | 9  |
| 2.5 | Atenolol                   | 107             | 7  | 103              | 6  | 107             | 12 | 88              | 11 | 84 <sup>a</sup> | 8  | 92              | 12 | 37               | 9  |
| 2.6 | Sulfadiazine               | 94              | 3  | 105              | 14 | 97              | 9  | 70              | 4  | 55              | 11 | 75              | 4  | 20               | 9  |
| 2.9 | 3-Methoxy Paracetamol      | 98 <sup>a</sup> | 8  | 105 <sup>a</sup> | 12 | 99              | 11 | 81 <sup>c</sup> | 3  | b               | -  | 87              | 10 | 79               | 18 |
| 3.0 | 3-Desmethyl Trimethoprim   | 102             | 6  | 104              | 5  | 105             | 9  | 85              | 7  | 63              | 16 | 79              | 11 | 63               | 9  |
| 3.1 | α-Hydroxy Trimethoprim     | 104             | 5  | 105              | 4  | 107             | 5  | 91              | 11 | 81              | 4  | 86              | 11 | 44               | 10 |
| 3.3 | Clopidol                   | 86 <sup>a</sup> | 6  | 99 <sup>a</sup>  | 8  | 94 <sup>a</sup> | 13 | 78 <sup>a</sup> | 10 | 74 <sup>a</sup> | 5  | 70 <sup>a</sup> | 5  | 77               | 9  |
| 3.3 | Gabapentin                 | 89              | 8  | 112              | 18 | 92              | 12 | 7               | 5  | b               | -  | 2               | 2  | 7 <sup>d</sup>   | 2  |
| 3.6 | Trimethoprim               | 103             | 10 | 109              | 4  | 105             | 9  | 69              | 6  | 50 <sup>a</sup> | 7  | 75              | 10 | 53               | 19 |
| 3.6 | Caffeine                   | 59              | 29 | 99 <sup>c</sup>  | 23 | 73              | 27 | b               | -  | b               | -  | 64 <sup>a</sup> | 20 | 101 <sup>e</sup> | 1  |
| 3.6 | Caffeine- <sup>13</sup> C  | 90              | 7  | 105              | 5  | 93              | 6  | 86              | 8  | 82              | 5  | 92              | 8  | 97               | 4  |
| 3.7 | Ofloxacin                  | 47              | 6  | 116              | 5  | 41              | 4  | 17              | 2  | 34              | 13 | 4               | 2  | 15               | 2  |
| 3.7 | Ofloxacin-d <sub>3</sub>   | 95              | 1  | 128              | 8  | 91              | 15 | 37              | 5  | 71              | 7  | 10              | 2  | 12               | 3  |
| 3.9 | Ciprofloxacin              | 59              | 28 | 106              | 34 | 50              | 20 | 194             | 36 | 43              | 8  | 87              | 4  | 18               | 6  |
| 4.0 | Lidocaine                  | 96              | 3  | 99               | 5  | 101             | 6  | 57              | 2  | 43              | 5  | 75              | 10 | 50               | 16 |
| 4.1 | Sulfamethoxazole           | 94              | 4  | 103              | 4  | 100             | 7  | 81              | 4  | 75              | 9  | 88              | 11 | 47               | 19 |
| 4.5 | Desmethylvenlafaxine       | 93              | 3  | 98               | 6  | 98              | 6  | 49              | 3  | 64 <sup>a</sup> | 13 | 76              | 11 | 54               | 13 |

|     |                                             |                 |    |                  |    |                 |    |                 |    |                 |    |                 |    |                 |    |
|-----|---------------------------------------------|-----------------|----|------------------|----|-----------------|----|-----------------|----|-----------------|----|-----------------|----|-----------------|----|
| 4.7 | Acebutolol-d <sub>5</sub>                   | 102             | 8  | 106              | 7  | 105             | 11 | 80              | 8  | 76              | 3  | 79              | 7  | 22              | 5  |
| 4.7 | Acebutolol                                  | 104             | 6  | 112              | 10 | 107             | 10 | 83              | 2  | 83              | 7  | 78              | 8  | 22              | 4  |
| 4.7 | Lamotrigine                                 | 93              | 7  | 100              | 5  | 98              | 6  | 46              | 5  | 61              | 11 | 71              | 11 | 29 <sup>c</sup> | 10 |
| 4.8 | Metoprolol-d <sub>7</sub>                   | 96              | 4  | 98               | 4  | 99              | 5  | 62              | 4  | 66              | 4  | 75              | 9  | 24              | 4  |
| 4.8 | Metoprolol                                  | 97              | 10 | 102              | 8  | 106             | 8  | 55              | 8  | 71              | 13 | 77              | 8  | 22              | 4  |
| 4.8 | Primidone-d <sub>5</sub>                    | 92              | 13 | 99               | 4  | 93              | 10 | 74              | 11 | 85              | 6  | 90              | 12 | 75              | 9  |
| 4.8 | Primidone                                   | 96              | 8  | 95               | 3  | 98              | 8  | 72              | 8  | 78              | 5  | 92              | 10 | 84              | 9  |
| 4.9 | Fluconazole                                 | 89              | 6  | 97               | 4  | 96              | 7  | 67              | 7  | 75              | 5  | 84              | 4  | 91              | 9  |
| 5.4 | Ifosfamide                                  | 88              | 3  | 102              | 9  | 94              | 7  | 57              | 5  | 71              | 8  | 85              | 8  | 77              | 6  |
| 5.5 | 4-Hydroxy Omeprazole                        | 89              | 6  | 102              | 2  | 97              | 9  | 57 <sup>a</sup> | 13 | 55 <sup>a</sup> | 2  | 69              | 9  | 86              | 26 |
| 5.8 | Chlorpheniramine-d <sub>6</sub>             | 175             | 12 | 164              | 25 | 209             | 16 | 111             | 10 | 96              | 7  | 44              | 13 | 72              | 12 |
| 5.9 | Chlorpheniramine                            | 82              | 23 | 162              | 9  | 97              | 25 | 189             | 11 | <sup>b</sup>    | -  | 20              | 11 | 67              | 38 |
| 5.8 | Carbamazepine-10,11-epoxide-d <sub>10</sub> | 89              | 10 | 108              | 16 | 87              | 8  | 77              | 10 | 92              | 18 | 89              | 15 | 73              | 9  |
| 5.9 | Carbamazepine-10,11-epoxide                 | 87              | 5  | 100              | 4  | 91              | 7  | 79              | 8  | 84              | 9  | 84              | 7  | 93              | 9  |
| 5.8 | Venlafaxine-d <sub>6</sub>                  | 95              | 6  | 99               | 7  | 99              | 7  | 58              | 4  | 60              | 4  | 70              | 5  | 55              | 8  |
| 5.9 | Venlafaxine                                 | 91              | 5  | 108              | 11 | 101             | 8  | 53              | 7  | <sup>b</sup>    | -  | 55              | 12 | 49 <sup>e</sup> | 20 |
| 5.9 | Bisoprolol-d <sub>5</sub>                   | 107             | 4  | 103              | 11 | 103             | 4  | 101             | 4  | 93              | 7  | 88              | 13 | 24              | 4  |
| 5.9 | Bisoprolol                                  | 109             | 4  | 111              | 10 | 108             | 6  | 105             | 5  | 84 <sup>a</sup> | 15 | 85              | 12 | 24              | 7  |
| 6.0 | Propranolol-d <sub>7</sub>                  | 94              | 9  | 102              | 12 | 106             | 11 | 80              | 6  | 71              | 8  | 33              | 10 | <sup>d</sup>    | -  |
| 6.1 | Propranolol                                 | 90              | 6  | 95               | 12 | 101             | 9  | 65              | 5  | 54 <sup>a</sup> | 6  | 25              | 6  | 32              | 12 |
| 6.2 | Citalopram-d <sub>6</sub>                   | 84              | 7  | 96               | 18 | 113             | 8  | 117             | 5  | 108             | 16 | 13              | 5  | 65              | 10 |
| 6.2 | Citalopram                                  | 85              | 12 | 103              | 6  | 118             | 13 | 69              | 14 | <sup>b</sup>    | -  | 12              | 4  | 73 <sup>c</sup> | 10 |
| 6.2 | Desmethylcitalopram                         | 88              | 12 | 99               | 9  | 118             | 12 | 62              | 9  | 54 <sup>a</sup> | 7  | 7               | 6  | 8               | 3  |
| 6.5 | Omeprazole                                  | 26 <sup>a</sup> | 6  | 21 <sup>a</sup>  | 13 | 23 <sup>a</sup> | 3  | 37 <sup>a</sup> | 19 | 30 <sup>a</sup> | 6  | 54 <sup>a</sup> | 19 | <sup>d</sup>    | -  |
| 6.8 | Hydroxyibuprofen                            | 90 <sup>a</sup> | 9  | 116 <sup>c</sup> | 20 | 95 <sup>a</sup> | 5  | <sup>b</sup>    | -  | <sup>b</sup>    | -  | 50 <sup>a</sup> | 13 | 34              | 1  |
| 6.9 | Carbamazepine-d <sub>10</sub>               | 91              | 8  | 103              | 6  | 93              | 10 | 52              | 6  | 51              | 5  | 79              | 10 | 72              | 14 |

|     |                                                |                 |    |                  |    |                 |    |                 |    |                  |    |                  |    |                  |    |
|-----|------------------------------------------------|-----------------|----|------------------|----|-----------------|----|-----------------|----|------------------|----|------------------|----|------------------|----|
| 6.9 | Carbamazepine                                  | 89              | 5  | 101              | 5  | 91              | 5  | 53              | 5  | 45               | 7  | 72               | 10 | 64               | 5  |
| 7.1 | Mebendazole                                    | 63 <sup>a</sup> | 2  | 41 <sup>a</sup>  | 26 | 67 <sup>a</sup> | 2  | 52 <sup>a</sup> | 1  | 23 <sup>a</sup>  | 5  | 33 <sup>a</sup>  | 1  | 25               | 9  |
| 7.3 | Fexofenadine                                   | 97              | 3  | 103              | 11 | 100             | 6  | 65 <sup>a</sup> | 2  | <sup>b</sup>     | -  | 71               | 4  | 112              | 31 |
| 7.4 | Erythromycin                                   | 75              | 59 | 140              | 19 | 63              | 45 | 3               | 1  | 2                | 1  | 21               | 18 | 33 <sup>e</sup>  | 22 |
| 7.5 | Lansoprazole                                   | 23 <sup>a</sup> | 5  | 19 <sup>a</sup>  | 8  | 19 <sup>a</sup> | 4  | 35              | 20 | 29 <sup>a</sup>  | 20 | 19 <sup>a</sup>  | 11 | <sup>d</sup>     | -  |
| 7.5 | Oxazepam-d <sub>5</sub>                        | 90              | 8  | 102              | 17 | 83              | 16 | 143             | 32 | 60               | 22 | 68               | 11 | 107              | 16 |
| 7.6 | Oxazepam                                       | 91              | 5  | 93               | 8  | 90              | 4  | 111             | 26 | <sup>b</sup>     | -  | 68               | 12 | 80               | 17 |
| 7.6 | Lorazepam                                      | 93              | 15 | 94               | 11 | 101             | 22 | 88 <sup>a</sup> | 7  | 25 <sup>a</sup>  | 8  | 75               | 14 | 84               | 21 |
| 7.7 | Climbazole                                     | 88              | 5  | 100              | 4  | 89              | 6  | 60              | 14 | 9                | 7  | 18               | 7  | 36               | 16 |
| 7.7 | Fluoxetine-d <sub>6</sub>                      | 26              | 7  | 35               | 10 | 73              | 13 | 34              | 6  | 13               | 5  | 1 <sup>a</sup>   | 0  | 10               | 29 |
| 7.7 | Fluoxetine                                     | 32              | 11 | 34               | 4  | 101             | 23 | 43              | 13 | 8                | 3  | 1 <sup>a</sup>   | 3  | 5                | 2  |
| 7.8 | Temazepam-d <sub>5</sub>                       | 94              | 6  | 105              | 5  | 92              | 9  | 102             | 5  | 32               | 13 | 72               | 7  | 108              | 13 |
| 7.8 | Temazepam                                      | 95              | 7  | 100              | 5  | 99              | 6  | 99              | 14 | 19               | 7  | 72               | 7  | 79               | 13 |
| 7.8 | Ketoprofen                                     | 94              | 5  | 100              | 9  | 96              | 7  | 101             | 8  | 27               | 11 | 92               | 13 | 112              | 13 |
| 7.9 | Cetirizine                                     | 68              | 19 | 95               | 17 | 68              | 16 | 38              | 14 | <sup>b</sup>     | -  | 46               | 19 | 46               | 17 |
| 8.1 | Clarithromycin                                 | 166             | 30 | 137              | 26 | 154             | 38 | 67              | 10 | 16               | 4  | 27               | 9  | 23 <sup>e</sup>  | 7  |
| 8.1 | Clarithromycin- <sup>13</sup> C-d <sub>3</sub> | 144             | 25 | 104              | 34 | 140             | 42 | 68              | 16 | 17               | 5  | 21               | 7  | 39               | 9  |
| 8.1 | Norethisterone                                 | 87              | 10 | 95               | 7  | 95              | 10 | 42              | 6  | 30               | 12 | 55               | 10 | 48               | 10 |
| 8.1 | Bezafibrate                                    | 97              | 6  | 102              | 6  | 99              | 6  | 85              | 12 | 36               | 13 | 88               | 12 | 118              | 10 |
| 8.2 | Clotrimazole                                   | 81              | 15 | 58               | 11 | 47              | 16 | 24              | 4  | 19               | 3  | 1                | 0  | 25 <sup>e</sup>  | 11 |
| 8.2 | Crotamiton                                     | 93              | 4  | 97               | 4  | 98              | 7  | 46              | 6  | 16 <sup>c</sup>  | 4  | 63               | 6  | 42               | 12 |
| 8.2 | Warfarin                                       | 95              | 4  | 98               | 4  | 97              | 8  | 63              | 5  | 33               | 9  | 83               | 7  | 86               | 15 |
| 9.0 | Atorvastatin                                   | 84              | 7  | 105              | 5  | 79              | 5  | 27              | 9  | <sup>b</sup>     | -  | 31               | 7  | 40               | 5  |
| 9.4 | Miconazole                                     | 85              | 30 | 43               | 8  | 27              | 17 | 8               | 2  | 11               | 6  | 1 <sup>a</sup>   | 6  | 30 <sup>e</sup>  | 11 |
| 5.6 | Estriol                                        | 104             | 23 | 96 <sup>a</sup>  | 4  | 95              | 18 | 64              | 5  | 132 <sup>c</sup> | 7  | 85               | 11 | 73               | 15 |
| 6.0 | Naproxen                                       | 92 <sup>a</sup> | 8  | 102 <sup>a</sup> | 11 | 84              | 6  | 81 <sup>a</sup> | 7  | <sup>b</sup>     | -  | 104 <sup>a</sup> | 7  | 108 <sup>c</sup> | 17 |

|     |                                      |                  |    |                  |    |                 |    |                 |    |                 |    |                 |    |                 |    |
|-----|--------------------------------------|------------------|----|------------------|----|-----------------|----|-----------------|----|-----------------|----|-----------------|----|-----------------|----|
| 7.1 | Diclofenac                           | 96 <sup>a</sup>  | 5  | 99 <sup>a</sup>  | 4  | 96 <sup>a</sup> | 3  | 69 <sup>a</sup> | 4  | 92 <sup>a</sup> | 18 | 85 <sup>a</sup> | 5  | 49 <sup>e</sup> | 9  |
| 7.4 | 17 $\beta$ -Estradiol-d <sub>4</sub> | 98               | 7  | 96               | 6  | 95              | 3  | 73              | 5  | 81              | 3  | 46              | 5  | 39              | 11 |
| 7.4 | 17 $\beta$ -Estradiol                | 98               | 9  | 99               | 9  | 98              | 10 | 70              | 10 | 77              | 9  | 43              | 5  | 35              | 12 |
| 7.5 | Estrone-d <sub>4</sub>               | 99               | 4  | 102              | 7  | 99              | 6  | 72              | 3  | 79              | 4  | 43              | 5  | 33              | 7  |
| 7.5 | Estrone                              | 106              | 15 | 102              | 3  | 97              | 6  | 62              | 12 | 86 <sup>c</sup> | 5  | 41              | 6  | 36              | 11 |
| 7.5 | 17 $\alpha$ -Ethinylestradiol        | 103              | 17 | 103 <sup>a</sup> | 7  | 107             | 18 | 71 <sup>a</sup> | 11 | 71 <sup>a</sup> | 11 | 19 <sup>a</sup> | 3  | 35              | 12 |
| 7.5 | Ibuprofen                            | 101 <sup>a</sup> | 5  | 89 <sup>a</sup>  | 6  | 89 <sup>a</sup> | 5  | b               | -  | b               | -  | 77 <sup>a</sup> | 11 | b               | -  |
| 7.6 | Ibuprofen-d <sub>3</sub>             | 99               | 15 | 109              | 14 | 93              | 8  | 172             | 14 | 115             | 7  | 100             | 10 | 95              | 15 |
| 8.7 | Gemfibrozil                          | 91               | 10 | 102 <sup>a</sup> | 4  | 91              | 10 | 17              | 4  | 67 <sup>a</sup> | 4  | 75              | 9  | 36              | 7  |

a) calculated from  $c \geq 10 \mu\text{g L}^{-1}$ , b) c too high in sample, c) calculated from  $c \geq 50 \mu\text{g L}^{-1}$ , d) method not suitable, e) calculated from  $c \geq 100 \mu\text{g L}^{-1}$

If an EC concentration in the SPE sample was too high for the calculation of the absolute recovery ( $REC_{SPE, matrix 1}$ ) to be practical (Table S9), a theoretical absolute recovery was calculated from the average ratios of the absolute recoveries in direct injection ( $REC_{di, matrix}$ ) and SPE ( $REC_{SPE, matrix}$ ) (equation S6) and used to determine *MDL* and *MQL* as described in equations S4 and S5, respectively. For ECs with isotopically labelled EC, the absolute recovery of the isotopically labelled EC was used.

$$REC_{SPE, matrix 1} = REC_{di, matrix 1} \cdot 0.5 \cdot \left( \frac{REC_{SPE, matrix 2}}{REC_{di, matrix 2}} + \frac{REC_{SPE, matrix 3}}{REC_{di, matrix 3}} \right) \quad (S6)$$

Relative recoveries (Figure 4) were calculated accordingly.

Table S10: Method detection (*MDL*) and quantitation limits (*MQL*) in influent, effluent, river water and sludge analysed by direct injection and *SPE*

| RT<br>/min | Analyte | Direct injection in $\mu\text{g L}^{-1}$ |     |          |     |       |     | SPE in $\mu\text{g L}^{-1}$ |     |          |     |       |     | Sludge in $\mu\text{g kg}^{-1}$ |     |
|------------|---------|------------------------------------------|-----|----------|-----|-------|-----|-----------------------------|-----|----------|-----|-------|-----|---------------------------------|-----|
|            |         | Influent                                 |     | Effluent |     | River |     | Influent                    |     | Effluent |     | River |     | MDL                             | MQL |
|            |         | MDL                                      | MQL | MDL      | MQL | MDL   | MQL | MDL                         | MQL | MDL      | MQL | MDL   | MQL |                                 |     |
|            |         |                                          |     |          |     |       |     |                             |     |          |     |       |     |                                 |     |

|     |                          |                           |       |                           |       |                           |       |                           |                           |                           |                           |                           |                           |       |       |
|-----|--------------------------|---------------------------|-------|---------------------------|-------|---------------------------|-------|---------------------------|---------------------------|---------------------------|---------------------------|---------------------------|---------------------------|-------|-------|
| 0.7 | Guanylurea               | 0.53                      | 1.1   | 0.51                      | 1.0   | 0.15                      | 0.30  | a                         | a                         | a                         | a                         | a                         | a                         | a     | a     |
| 0.8 | Metformin                | 0.035                     | 0.069 | 0.029                     | 0.058 | 0.030                     | 0.060 | a                         | a                         | a                         | a                         | a                         | a                         | a     | a     |
| 1.2 | Sulfanilamide            | 0.66                      | 1.3   | 0.72                      | 1.4   | 0.57                      | 1.1   | 0.045                     | 0.091                     | 0.033                     | 0.067                     | 0.016                     | 0.031                     | a     | a     |
| 1.7 | Cotinine                 | 5.9 ·<br>10 <sup>-3</sup> | 0.019 | 5.4 ·<br>10 <sup>-3</sup> | 0.017 | 5.9 ·<br>10 <sup>-3</sup> | 0.019 | 6.3 ·<br>10 <sup>-5</sup> | 2.0 ·<br>10 <sup>-4</sup> | 6.1 ·<br>10 <sup>-5</sup> | 2.0 ·<br>10 <sup>-4</sup> | 2.9 ·<br>10 <sup>-5</sup> | 8.9 ·<br>10 <sup>-5</sup> | 0.025 | 0.080 |
| 2.0 | Amidotrizoic acid        | 0.12                      | 0.35  | 0.11                      | 0.34  | 0.10                      | 0.36  | a                         | a                         | a                         | a                         | a                         | a                         | a     | a     |
| 2.2 | Amoxicillin              | 1.0                       | 1.3   | 0.93                      | 1.2   | 0.91                      | 1.1   | 0.073                     | 0.091                     | 0.026                     | 0.032                     | 0.40                      | 0.50                      | a     | a     |
| 2.3 | Sotalol                  | 5.5 ·<br>10 <sup>-3</sup> | 0.044 | 5.6 ·<br>10 <sup>-3</sup> | 0.045 | 5.6 ·<br>10 <sup>-3</sup> | 0.045 | 5.8 ·<br>10 <sup>-5</sup> | 4.6 ·<br>10 <sup>-4</sup> | 5.6 ·<br>10 <sup>-5</sup> | 4.5 ·<br>10 <sup>-4</sup> | 2.9 ·<br>10 <sup>-5</sup> | 2.3 ·<br>10 <sup>-4</sup> | 0.090 | 0.72  |
| 2.4 | Paracetamol              | 0.086                     | 0.29  | 0.077                     | 0.26  | 0.082                     | 0.27  | 1.1 ·<br>10 <sup>-3</sup> | 3.8 ·<br>10 <sup>-3</sup> | 1.7 ·<br>10 <sup>-3</sup> | 5.6 ·<br>10 <sup>-3</sup> | 6.5 ·<br>10 <sup>-4</sup> | 2.2 ·<br>10 <sup>-3</sup> | 1.0   | 3.1   |
| 2.5 | Salbutamol               | 5.5 ·<br>10 <sup>-3</sup> | 0.044 | 5.2 ·<br>10 <sup>-3</sup> | 0.042 | 5.5 ·<br>10 <sup>-3</sup> | 0.044 | 5.4 ·<br>10 <sup>-5</sup> | 4.3 ·<br>10 <sup>-4</sup> | 5.3 ·<br>10 <sup>-5</sup> | 4.2 ·<br>10 <sup>-4</sup> | 3.2 ·<br>10 <sup>-5</sup> | 2.5 ·<br>10 <sup>-4</sup> | 0.19  | 1.6   |
| 2.5 | Ranitidine               | 0.046                     | 0.092 | 0.039                     | 0.078 | 0.047                     | 0.094 | 8.5 ·<br>10 <sup>-4</sup> | 1.7 ·<br>10 <sup>-3</sup> | 5.1 ·<br>10 <sup>-4</sup> | 1.0 ·<br>10 <sup>-3</sup> | 2.9 ·<br>10 <sup>-4</sup> | 5.9 ·<br>10 <sup>-4</sup> | a     | a     |
| 2.5 | Atenolol                 | 0.026                     | 0.10  | 0.027                     | 0.11  | 0.026                     | 0.10  | 2.8 ·<br>10 <sup>-4</sup> | 1.1 ·<br>10 <sup>-3</sup> | 3.0 ·<br>10 <sup>-4</sup> | 1.2 ·<br>10 <sup>-3</sup> | 1.4 ·<br>10 <sup>-4</sup> | 5.4 ·<br>10 <sup>-4</sup> | 0.33  | 1.3   |
| 2.6 | Sulfadiazine             | 0.024                     | 0.079 | 0.021                     | 0.071 | 0.023                     | 0.076 | 2.9 ·<br>10 <sup>-4</sup> | 9.5 ·<br>10 <sup>-4</sup> | 3.6 ·<br>10 <sup>-4</sup> | 1.2 ·<br>10 <sup>-3</sup> | 1.3 ·<br>10 <sup>-4</sup> | 4.4 ·<br>10 <sup>-4</sup> | 0.49  | 1.6   |
| 2.9 | 3-Methoxy Paracetamol    | 0.034                     | 0.11  | 0.032                     | 0.11  | 0.034                     | 0.11  | 3.7 ·<br>10 <sup>-4</sup> | 1.2 ·<br>10 <sup>-3</sup> | 3.4 ·<br>10 <sup>-4</sup> | 1.1 ·<br>10 <sup>-3</sup> | 1.7 ·<br>10 <sup>-4</sup> | 5.7 ·<br>10 <sup>-4</sup> | 0.19  | 0.63  |
| 3.0 | 3-Desmethyl Trimethoprim | 5.6 ·<br>10 <sup>-3</sup> | 0.019 | 0.055                     | 0.018 | 0.055                     | 0.018 | 6.1 ·<br>10 <sup>-5</sup> | 2.0 ·<br>10 <sup>-4</sup> | 8.2 ·<br>10 <sup>-5</sup> | 2.7 ·<br>10 <sup>-4</sup> | 3.3 ·<br>10 <sup>-5</sup> | 1.1 ·<br>10 <sup>-4</sup> | 0.041 | 0.14  |
| 3.1 | α-Hydroxy Trimethoprim   | 0.053                     | 0.11  | 0.053                     | 0.11  | 0.052                     | 0.10  | 5.5 ·<br>10 <sup>-4</sup> | 1.1 ·<br>10 <sup>-3</sup> | 6.2 ·<br>10 <sup>-4</sup> | 1.2 ·<br>10 <sup>-3</sup> | 2.9 ·<br>10 <sup>-4</sup> | 5.8 ·<br>10 <sup>-4</sup> | 0.57  | 1.1   |
| 3.3 | Clopidol                 | 0.41                      | 1.4   | 0.35                      | 1.2   | 0.37                      | 1.2   | 4.0 ·<br>10 <sup>-3</sup> | 0.013                     | 4.3 ·<br>10 <sup>-3</sup> | 0.014                     | 2.3 ·<br>10 <sup>-3</sup> | 7.5 ·<br>10 <sup>-3</sup> | 2.1   | 6.9   |
| 3.3 | Gabapentin               | 0.62                      | 1.2   | 0.50                      | 0.99  | 0.60                      | 1.2   | a                         | a                         | a                         | a                         | a                         | a                         | a     | a     |
| 3.6 | Trimethoprim             | 0.013                     | 0.045 | 0.013                     | 0.042 | 0.013                     | 0.044 | 1.8 ·<br>10 <sup>-4</sup> | 6.0 ·<br>10 <sup>-4</sup> | 2.5 ·<br>10 <sup>-4</sup> | 8.3 ·<br>10 <sup>-4</sup> | 8.3 ·<br>10 <sup>-5</sup> | 2.8 ·<br>10 <sup>-4</sup> | 0.12  | 0.39  |
| 3.6 | Caffeine                 | 0.099                     | 0.35  | 0.090                     | 0.31  | 0.096                     | 0.33  | 9.3 ·<br>10 <sup>-4</sup> | 3.3 ·<br>10 <sup>-3</sup> | 9.8 ·<br>10 <sup>-3</sup> | 3.4 ·<br>10 <sup>-3</sup> | 4.3 ·<br>10 <sup>-4</sup> | 1.5 ·<br>10 <sup>-3</sup> | 0.40  | 1.4   |

|     |                             |                     |       |                     |       |                     |       |                     |                     |                     |                     |                     |                     |       |       |
|-----|-----------------------------|---------------------|-------|---------------------|-------|---------------------|-------|---------------------|---------------------|---------------------|---------------------|---------------------|---------------------|-------|-------|
| 3.7 | Ofloxacin                   | 0.058               | 0.12  | 0.043               | 0.087 | 0.14                | 0.27  | $2.9 \cdot 10^{-3}$ | $5.9 \cdot 10^{-3}$ | $1.5 \cdot 10^{-3}$ | $2.9 \cdot 10^{-3}$ | $6.3 \cdot 10^{-3}$ | 0.013               | 1.6   | 3.2   |
| 3.9 | Ciprofloxacin               | 0.038               | 0.094 | 0.021               | 0.052 | 0.044               | 0.11  | $1.0 \cdot 10^{-4}$ | $2.6 \cdot 10^{-4}$ | $4.7 \cdot 10^{-4}$ | $1.2 \cdot 10^{-3}$ | $1.1 \cdot 10^{-4}$ | $2.9 \cdot 10^{-4}$ | 0.56  | 1.4   |
| 4.0 | Lidocaine                   | $6.3 \cdot 10^{-3}$ | 0.021 | $6.1 \cdot 10^{-3}$ | 0.020 | $6.0 \cdot 10^{-3}$ | 0.020 | $9.6 \cdot 10^{-5}$ | $3.2 \cdot 10^{-4}$ | $1.3 \cdot 10^{-4}$ | $4.2 \cdot 10^{-4}$ | $3.6 \cdot 10^{-5}$ | $1.2 \cdot 10^{-4}$ | 0.054 | 0.18  |
| 4.1 | Sulfamethoxazole            | 0.059               | 0.12  | 0.054               | 0.11  | 0.056               | 0.11  | $6.2 \cdot 10^{-4}$ | $1.2 \cdot 10^{-3}$ | $6.7 \cdot 10^{-4}$ | $1.3 \cdot 10^{-3}$ | $2.8 \cdot 10^{-4}$ | $5.7 \cdot 10^{-4}$ | 0.54  | 1.1   |
| 4.5 | Desmethylvenlafaxine        | $6.0 \cdot 10^{-3}$ | 0.012 | $5.7 \cdot 10^{-3}$ | 0.011 | $5.7 \cdot 10^{-3}$ | 0.011 | $1.0 \cdot 10^{-4}$ | $2.0 \cdot 10^{-4}$ | $7.8 \cdot 10^{-5}$ | $1.6 \cdot 10^{-4}$ | $3.3 \cdot 10^{-5}$ | $6.6 \cdot 10^{-5}$ | 0.046 | 0.093 |
| 4.7 | Acebutolol                  | 0.053               | 0.18  | 0.050               | 0.17  | 0.052               | 0.17  | $6.0 \cdot 10^{-4}$ | $2.0 \cdot 10^{-3}$ | $6.0 \cdot 10^{-4}$ | $2.0 \cdot 10^{-3}$ | $3.2 \cdot 10^{-4}$ | $1.1 \cdot 10^{-3}$ | 1.1   | 3.7   |
| 4.7 | Lamotrigine                 | 0.21                | 0.70  | 0.20                | 0.65  | 0.20                | 0.67  | $3.8 \cdot 10^{-3}$ | 0.013               | $2.9 \cdot 10^{-3}$ | $9.6 \cdot 10^{-3}$ | $1.2 \cdot 10^{-3}$ | $4.1 \cdot 10^{-3}$ | 3.1   | 10    |
| 4.8 | Primidone                   | 0.071               | 0.24  | 0.072               | 0.24  | 0.069               | 0.24  | $8.5 \cdot 10^{-4}$ | $2.8 \cdot 10^{-3}$ | $7.8 \cdot 10^{-4}$ | $2.6 \cdot 10^{-3}$ | $3.3 \cdot 10^{-4}$ | $1.1 \cdot 10^{-3}$ | 0.36  | 1.2   |
| 4.8 | Metoprolol                  | 0.11                | 0.57  | 0.11                | 0.54  | 0.10                | 0.52  | $1.8 \cdot 10^{-3}$ | $9.1 \cdot 10^{-3}$ | $1.4 \cdot 10^{-3}$ | $7.0 \cdot 10^{-3}$ | $6.5 \cdot 10^{-4}$ | $3.2 \cdot 10^{-3}$ | 2.3   | 12    |
| 4.9 | Fluconazole                 | 0.037               | 0.12  | 0.034               | 0.11  | 0.035               | 0.12  | $4.5 \cdot 10^{-4}$ | $1.5 \cdot 10^{-3}$ | $4.0 \cdot 10^{-4}$ | $1.3 \cdot 10^{-3}$ | $1.8 \cdot 10^{-4}$ | $6.0 \cdot 10^{-4}$ | 0.17  | 0.55  |
| 5.4 | Ifosfamide                  | 0.063               | 0.32  | 0.054               | 0.27  | 0.059               | 0.30  | $8.8 \cdot 10^{-4}$ | $4.4 \cdot 10^{-3}$ | $7.0 \cdot 10^{-4}$ | $3.5 \cdot 10^{-3}$ | $2.9 \cdot 10^{-4}$ | $1.5 \cdot 10^{-3}$ | 0.32  | 1.6   |
| 5.5 | 4-Hydroxy Omeprazole        | 0.012               | 0.12  | 0.011               | 0.11  | 0.011               | 0.11  | $1.8 \cdot 10^{-4}$ | $1.8 \cdot 10^{-3}$ | $1.8 \cdot 10^{-4}$ | $1.8 \cdot 10^{-3}$ | $7.2 \cdot 10^{-5}$ | $7.2 \cdot 10^{-4}$ | 0.058 | 0.58  |
| 5.9 | Chlorpheniramine            | 0.15                | 0.48  | 0.073               | 0.24  | 0.12                | 0.41  | $5.7 \cdot 10^{-4}$ | $1.9 \cdot 10^{-3}$ | $1.1 \cdot 10^{-3}$ | $3.7 \cdot 10^{-3}$ | $2.7 \cdot 10^{-3}$ | $8.9 \cdot 10^{-3}$ | 0.79  | 2.6   |
| 5.9 | Carbamazepine-10,11-epoxide | 0.038               | 0.13  | 0.033               | 0.11  | 0.037               | 0.12  | $3.8 \cdot 10^{-4}$ | $1.3 \cdot 10^{-3}$ | $3.6 \cdot 10^{-4}$ | $1.2 \cdot 10^{-3}$ | $1.8 \cdot 10^{-4}$ | $6.0 \cdot 10^{-4}$ | 0.16  | 0.54  |
| 5.9 | Venlafaxine                 | 0.12                | 0.31  | 0.10                | 0.26  | 0.11                | 0.28  | $1.9 \cdot 10^{-3}$ | $4.7 \cdot 10^{-3}$ | $1.6 \cdot 10^{-3}$ | $4.1 \cdot 10^{-3}$ | $9.1 \cdot 10^{-4}$ | $2.3 \cdot 10^{-3}$ | 1.0   | 2.5   |
| 5.9 | Bisoprolol                  | 0.010               | 0.031 | 0.010               | 0.030 | 0.010               | 0.031 | $9.5 \cdot 10^{-5}$ | $2.9 \cdot 10^{-4}$ | $1.2 \cdot 10^{-4}$ | $3.6 \cdot 10^{-4}$ | $5.9 \cdot 10^{-5}$ | $1.8 \cdot 10^{-4}$ | 0.21  | 0.62  |
| 6.1 | Propranolol                 | b                   | 0.12  | b                   | 0.12  | b                   | 0.11  | b                   | $1.3 \cdot$         | b                   | $1.4 \cdot$         | b                   | $2.0 \cdot$         | b     | 1.6   |

|     |                     |             |             |                     |             |             |             |                     |                     |                     |                     |                     |                     |       |      |
|-----|---------------------|-------------|-------------|---------------------|-------------|-------------|-------------|---------------------|---------------------|---------------------|---------------------|---------------------|---------------------|-------|------|
| 6.2 | Citalopram          | 0.026       | 0.13        | 0.022               | 0.11        | 0.019       | 0.094       | $1.7 \cdot 10^{-4}$ | $8.5 \cdot 10^{-4}$ | $1.9 \cdot 10^{-4}$ | $9.3 \cdot 10^{-4}$ | $8.3 \cdot 10^{-4}$ | $4.2 \cdot 10^{-3}$ | 0.14  | 0.68 |
| 6.2 | Desmethylcitalopram | 0.032       | 0.13        | 0.028               | 0.11        | 0.024       | 0.094       | $4.0 \cdot 10^{-4}$ | $1.6 \cdot 10^{-3}$ | $4.6 \cdot 10^{-4}$ | $1.9 \cdot 10^{-3}$ | $1.8 \cdot 10^{-3}$ | $7.1 \cdot 10^{-3}$ | 1.7   | 6.6  |
| 6.5 | Omeprazole          | 3.0         | 4.3         | 3.7                 | 5.3         | 3.4         | 4.8         | 0.019               | 0.027               | 0.023               | 0.033               | $6.5 \cdot 10^{-3}$ | $9.3 \cdot 10^{-3}$ | a     | a    |
| 6.8 | Hydroxyibuprofen    | 0.62        | 1.2         | 0.48                | 0.96        | 0.58        | 1.2         | 0.011               | 0.021               | $8.2 \cdot 10^{-3}$ | 0.016               | $5.0 \cdot 10^{-3}$ | 0.010               | 7.4   | 15   |
| 6.9 | Carbamazepine       | b           | 0.62        | b                   | 0.55        | b           | 0.61        | b                   | $9.4 \cdot 10^{-3}$ | b                   | 0.011               | b                   | $3.5 \cdot 10^{-3}$ | b     | 3.9  |
| 7.1 | Mebendazole         | b           | 8.8         | b                   | 14          | b           | 8.3         | b                   | 0.096               | b                   | 0.22                | b                   | 0.076               | b     | 49   |
| 7.3 | Fexofenadine        | 0.038       | 0.13        | 0.036               | 0.12        | 0.037       | 0.12        | $5.1 \cdot 10^{-4}$ | $1.7 \cdot 10^{-3}$ | $4.7 \cdot 10^{-4}$ | $1.6 \cdot 10^{-3}$ | $2.3 \cdot 10^{-4}$ | $7.8 \cdot 10^{-4}$ | 0.15  | 0.49 |
| 7.4 | Erythromycin        | 0.015       | 0.074       | $7.9 \cdot 10^{-3}$ | 0.040       | 0.018       | 0.088       | $3.3 \cdot 10^{-3}$ | 0.017               | $5.0 \cdot 10^{-3}$ | 0.025               | $2.4 \cdot 10^{-4}$ | $1.2 \cdot 10^{-3}$ | 0.15  | 0.76 |
| 7.5 | Lansoprazole        | 0.24        | 4.8         | 0.29                | 5.8         | 0.29        | 5.8         | $1.4 \cdot 10^{-3}$ | 0.028               | $1.7 \cdot 10^{-3}$ | 0.034               | $1.3 \cdot 10^{-3}$ | 0.026               | a     | a    |
| 7.6 | Oxazepam            | 0.24        | 0.61        | 0.24                | 0.60        | 0.25        | 0.62        | $1.8 \cdot 10^{-3}$ | $4.5 \cdot 10^{-3}$ | $3.3 \cdot 10^{-3}$ | $8.3 \cdot 10^{-3}$ | $1.5 \cdot 10^{-3}$ | $3.7 \cdot 10^{-3}$ | 1.3   | 3.1  |
| 7.6 | Lorazepam           | 0.12        | 0.60        | 0.12                | 0.59        | 0.11        | 0.55        | $1.1 \cdot 10^{-3}$ | $5.7 \cdot 10^{-3}$ | $4.0 \cdot 10^{-3}$ | 0.020               | $6.7 \cdot 10^{-4}$ | $3.3 \cdot 10^{-3}$ | 0.60  | 3.0  |
| 7.7 | Climbazole          | 0.13        | 0.32        | 0.11                | 0.28        | 0.12        | 0.31        | $1.7 \cdot 10^{-3}$ | $4.2 \cdot 10^{-3}$ | 0.011               | 0.028               | $2.8 \cdot 10^{-3}$ | $6.9 \cdot 10^{-3}$ | 1.4   | 3.5  |
| 7.7 | Fluoxetine          | 0.087       | 0.35        | 0.082               | 0.33        | 0.028       | 0.11        | $5.8 \cdot 10^{-4}$ | $2.3 \cdot 10^{-3}$ | $3.1 \cdot 10^{-3}$ | 0.013               | 0.013               | 0.050               | 2.5   | 10   |
| 7.8 | Temazepam           | 0.018       | 0.058       | 0.017               | 0.056       | 0.017       | 0.056       | $1.5 \cdot 10^{-4}$ | $5.1 \cdot 10^{-4}$ | $7.9 \cdot 10^{-4}$ | $2.6 \cdot 10^{-3}$ | $1.0 \cdot 10^{-4}$ | $3.5 \cdot 10^{-4}$ | 0.095 | 0.32 |
| 7.8 | Ketoprofen          | 0.18        | 0.59        | 0.17                | 0.56        | 0.17        | 0.58        | $1.6 \cdot 10^{-3}$ | $5.3 \cdot 10^{-3}$ | $1.0 \cdot 10^{-3}$ | $3.4 \cdot 10^{-3}$ | $6.5 \cdot 10^{-4}$ | $2.2 \cdot 10^{-3}$ | 0.67  | 2.2  |
| 7.9 | Cetirizine          | 0.098       | 0.33        | 0.070               | 0.23        | 0.098       | 0.33        | $1.5 \cdot 10^{-3}$ | $5.0 \cdot 10^{-3}$ | $5.6 \cdot 10^{-3}$ | 0.019               | $8.2 \cdot 10^{-4}$ | $2.7 \cdot 10^{-3}$ | 0.65  | 2.2  |
| 8.1 | Clarithromycin      | $3.3 \cdot$ | $6.7 \cdot$ | $4.1 \cdot$         | $8.1 \cdot$ | $3.6 \cdot$ | $7.2 \cdot$ | $7.5 \cdot$         | $1.5 \cdot$         | $3.1 \cdot$         | $6.3 \cdot$         | $9.3 \cdot$         | $1.9 \cdot$         | 0.11  | 0.22 |



|     |                      |                          |                          |                          |                          |                          |                          |                                            |                           |                                            |                           |                                            |                                            |      |     |
|-----|----------------------|--------------------------|--------------------------|--------------------------|--------------------------|--------------------------|--------------------------|--------------------------------------------|---------------------------|--------------------------------------------|---------------------------|--------------------------------------------|--------------------------------------------|------|-----|
| 8.1 | Norethisterone       | 10 <sup>-3</sup><br>0.19 | 10 <sup>-3</sup><br>0.64 | 10 <sup>-3</sup><br>0.18 | 10 <sup>-3</sup><br>0.58 | 10 <sup>-3</sup><br>0.18 | 10 <sup>-3</sup><br>0.58 | 10 <sup>-5</sup><br>3.6 · 10 <sup>-3</sup> | 10 <sup>-4</sup><br>0.012 | 10 <sup>-4</sup><br>5.0 · 10 <sup>-3</sup> | 10 <sup>-4</sup><br>0.017 | 10 <sup>-5</sup><br>1.4 · 10 <sup>-3</sup> | 10 <sup>-4</sup><br>4.5 · 10 <sup>-3</sup> | 1.6  | 5.2 |
| 8.1 | Bezafibrate          | 0.64                     | 2.1                      | 0.61                     | 2.0                      | 0.62                     | 2.1                      | 6.5 · 10 <sup>-3</sup>                     | 0.022                     | 0.015                                      | 0.051                     | 3.2 · 10 <sup>-3</sup>                     | 0.011                                      | 2.4  | 7.9 |
| 8.2 | Crotamiton           | 0.038                    | 0.13                     | 0.036                    | 0.12                     | 0.036                    | 0.12                     | 6.9 · 10 <sup>-4</sup>                     | 2.3 · 10 <sup>-3</sup>    | 2.0 · 10 <sup>-3</sup>                     | 6.6 · 10 <sup>-3</sup>    | 2.5 · 10 <sup>-4</sup>                     | 8.4 · 10 <sup>-4</sup>                     | 0.38 | 1.3 |
| 8.2 | Clotrimazole         | 0.069                    | 0.14                     | 0.096                    | 0.19                     | 0.12                     | 0.24                     | 2.1 · 10 <sup>-3</sup>                     | 4.2 · 10 <sup>-3</sup>    | 2.6 · 10 <sup>-3</sup>                     | 5.3 · 10 <sup>-3</sup>    | 0.025                                      | 0.050                                      | 0.98 | 2.0 |
| 8.2 | Warfarin             | 0.44                     | 1.2                      | 0.43                     | 1.1                      | 0.43                     | 1.1                      | 6.0 · 10 <sup>-3</sup>                     | 0.016                     | 0.011                                      | 0.030                     | 2.3 · 10 <sup>-3</sup>                     | 6.0 · 10 <sup>-3</sup>                     | 2.3  | 5.8 |
| 9.0 | Atorvastatin         | 0.070                    | 0.23                     | 0.056                    | 0.19                     | 0.074                    | 0.25                     | 1.9 · 10 <sup>-3</sup>                     | 6.5 · 10 <sup>-3</sup>    | 1.4 · 10 <sup>-3</sup>                     | 4.7 · 10 <sup>-3</sup>    | 8.5 · 10 <sup>-4</sup>                     | 2.8 · 10 <sup>-3</sup>                     | 0.66 | 2.2 |
| 9.4 | Miconazole           | b                        | 0.65                     | b                        | 1.3                      | b                        | 2.1                      | b                                          | 0.063                     | b                                          | 0.045                     | b                                          | 0.25                                       | b    | 8.3 |
| 5.6 | Estriol              | 0.11                     | 0.53                     | 0.12                     | 0.58                     | 0.12                     | 0.59                     | 1.6 · 10 <sup>-3</sup>                     | 7.8 · 10 <sup>-3</sup>    | 7.6 · 10 <sup>-4</sup>                     | 3.8 · 10 <sup>-3</sup>    | 5.9 · 10 <sup>-4</sup>                     | 2.9 · 10 <sup>-3</sup>                     | 0.68 | 3.4 |
| 6.0 | Naproxen             | 0.060                    | 1.2                      | 0.054                    | 1.1                      | 0.066                    | 1.3                      | 6.2 · 10 <sup>-4</sup>                     | 0.012                     | 4.6 · 10 <sup>-4</sup>                     | 9.2 · 10 <sup>-3</sup>    | 2.4 · 10 <sup>-4</sup>                     | 4.8 · 10 <sup>-3</sup>                     | 0.25 | 4.9 |
| 7.1 | Diclofenac           | b                        | 0.58                     | b                        | 0.56                     | b                        | 0.58                     | b                                          | 7.2 · 10 <sup>-3</sup>    | b                                          | 5.4 · 10 <sup>-3</sup>    | b                                          | 2.9 · 10 <sup>-3</sup>                     | b    | 5.1 |
| 7.4 | 17β-Estradiol        | 0.11                     | 1.1                      | 0.11                     | 1.1                      | 0.11                     | 1.1                      | 1.4 · 10 <sup>-3</sup>                     | 0.014                     | 1.3 · 10 <sup>-3</sup>                     | 0.013                     | 1.2 · 10 <sup>-3</sup>                     | 0.012                                      | 1.4  | 14  |
| 7.5 | Estrone              | 0.11                     | 0.31                     | 0.11                     | 0.33                     | 0.12                     | 0.34                     | 1.6 · 10 <sup>-3</sup>                     | 4.8 · 10 <sup>-3</sup>    | 1.2 · 10 <sup>-3</sup>                     | 3.5 · 10 <sup>-3</sup>    | 1.2 · 10 <sup>-3</sup>                     | 3.7 · 10 <sup>-3</sup>                     | 1.4  | 4.2 |
| 7.5 | 17α-Ethinylestradiol | 0.54                     | 1.1                      | 0.54                     | 1.1                      | 0.52                     | 1.0                      | 7.0 · 10 <sup>-3</sup>                     | 0.014                     | 7.0 · 10 <sup>-3</sup>                     | 0.014                     | 0.013                                      | 0.026                                      | 7.2  | 14  |
| 7.5 | Ibuprofen            | 0.10                     | 0.34                     | 0.087                    | 0.29                     | 0.11                     | 0.36                     | 5.2 · 10 <sup>-4</sup>                     | 1.7 · 10 <sup>-3</sup>    | 6.8 · 10 <sup>-4</sup>                     | 2.3 · 10 <sup>-3</sup>    | 4.3 · 10 <sup>-4</sup>                     | 1.4 · 10 <sup>-3</sup>                     | 0.47 | 1.6 |
| 8.7 | Gemfibrozil          | 0.061                    | 0.12                     | 0.054                    | 0.11                     | 0.061                    | 0.12                     | 2.9 · 10 <sup>-3</sup>                     | 5.9 · 10 <sup>-3</sup>    | 7.5 · 10 <sup>-4</sup>                     | 1.5 · 10 <sup>-3</sup>    | 3.3 · 10 <sup>-4</sup>                     | 6.7 · 10 <sup>-4</sup>                     | 0.70 | 1.4 |

a) method not suitable, b) blank that could be corrected for

Table S11: Method accuracy and precision for direct injection (both in %), samples spiked with 1, 10, and 50 µg L<sup>-1</sup> (n = 3).

| RT  | Analyte                  | Influent |     |     |           |    |    | Effluent |     |     |           |    |    | River    |     |     |           |    |    |
|-----|--------------------------|----------|-----|-----|-----------|----|----|----------|-----|-----|-----------|----|----|----------|-----|-----|-----------|----|----|
|     |                          | accuracy |     |     | precision |    |    | accuracy |     |     | precision |    |    | accuracy |     |     | precision |    |    |
|     |                          | 1        | 10  | 50  | 1         | 10 | 50 | 1        | 10  | 50  | 1         | 10 | 50 | 1        | 10  | 50  | 1         | 10 | 50 |
| 0.7 | Guanylurea               | 94       | 109 | 97  | 4         | 3  | 5  | a        | 117 | 116 | a         | 2  | 6  | 107      | 103 | 90  | 9         | 9  | 5  |
| 0.8 | Metformin                | 95       | 105 | 95  | 6         | 5  | 2  | a        | a   | 105 | a         | a  | 3  | 94       | 105 | 95  | 7         | 5  | 5  |
| 1.2 | Sulfanilamide            | b        | 109 | 107 | b         | 9  | 4  | b        | 104 | 105 | b         | 11 | 3  | b        | 102 | 104 | b         | 12 | 9  |
| 1.7 | Cotinine                 | 118      | 111 | 103 | 5         | 4  | 5  | 102      | 106 | 104 | 1         | 10 | 6  | 117      | 106 | 110 | 4         | 6  | 6  |
| 2.0 | Amidotrizoic acid        | 85       | 101 | 95  | 14        | 2  | 5  | 89       | 113 | 107 | 9         | 3  | 6  | 84       | 96  | 101 | 14        | 8  | 5  |
| 2.2 | Amoxicillin              | 116      | 109 | 110 | b         | 1  | 5  | 93       | 115 | 103 | 11        | 7  | 5  | b        | 96  | 102 | b         | 11 | 3  |
| 2.3 | Sotalol                  | 106      | 107 | 97  | 2         | 2  | 1  | 112      | 113 | 109 | 2         | 2  | 4  | 103      | 109 | 98  | 2         | 4  | 5  |
| 2.4 | Paracetamol              | b        | 110 | 105 | b         | 8  | 6  | a        | a   | a   | a         | a  | a  | b        | 111 | 104 | b         | 4  | 3  |
| 2.5 | Salbutamol               | 99       | 104 | 94  | 7         | 5  | 8  | 106      | 109 | 100 | 4         | 3  | 5  | 105      | 98  | 95  | 1         | 11 | 1  |
| 2.5 | Ranitidine               | b        | 105 | 124 | b         | 4  | 8  | b        | 104 | 111 | b         | 5  | 9  | b        | 103 | 128 | 2         | 6  | 5  |
| 2.5 | Atenolol                 | 98       | 102 | 92  | 10        | 3  | 8  | a        | 101 | 101 | a         | 6  | 6  | 93       | 107 | 91  | 3         | 10 | 4  |
| 2.6 | Sulfadiazine             | 93       | 96  | 94  | 5         | 2  | 19 | 104      | 106 | 105 | 8         | 5  | 5  | 106      | 97  | 93  | 17        | 5  | 4  |
| 2.9 | 3-Methoxy Paracetamol    | 107      | 101 | 94  | 9         | 4  | 4  | a        | 84  | 89  | 4         | 4  | 3  | 108      | 97  | 98  | 12        | 3  | 4  |
| 3.0 | 3-Desmethyl Trimethoprim | 88       | 94  | 88  | 5         | 1  | 8  | 85       | 86  | 91  | 7         | 5  | 6  | 88       | 91  | 90  | 11        | 5  | 8  |
| 3.1 | α-Hydroxy Trimethoprim   | 91       | 91  | 84  | 6         | 0  | 12 | 101      | 98  | 97  | 5         | 5  | 5  | 91       | 92  | 84  | 10        | 7  | 7  |
| 3.3 | Clopidol                 | a        | 100 | 98  | b         | 1  | 12 | a        | 107 | 107 | b         | 5  | 8  | a        | 104 | 93  | b         | 7  | 11 |
| 3.3 | Gabapentin               | 95       | 94  | 93  | 7         | 2  | 14 | a        | 97  | 105 | 2         | 2  | 4  | 107      | 95  | 89  | b         | b  | 7  |
| 3.6 | Trimethoprim             | 95       | 101 | 100 | 2         | 3  | 6  | 102      | 109 | 104 | 3         | 3  | 4  | 94       | 101 | 100 | 8         | 7  | 5  |
| 3.6 | Caffeine                 | a        | 107 | 109 | a         | 8  | 14 | a        | a   | 108 | a         | a  | 9  | b        | 117 | 113 | b         | 9  | 4  |
| 3.7 | Ofloxacin                | 162      | 160 | 58  | 5         | 2  | 5  | 130      | 144 | 82  | 5         | 4  | 5  | 165      | 153 | 61  | 5         | 12 | 9  |
| 3.9 | Ciprofloxacin            | 83       | 119 | 47  | 11        | 2  | 5  | 76       | 97  | 62  | 10        | 3  | 2  | 90       | 117 | 49  | 25        | 12 | 10 |

|     |                             |     |     |     |     |    |    |     |     |     |    |    |    |     |     |     |    |    |    |
|-----|-----------------------------|-----|-----|-----|-----|----|----|-----|-----|-----|----|----|----|-----|-----|-----|----|----|----|
| 4.0 | Lidocaine                   | 90  | 95  | 86  | 3   | 6  | 8  | 103 | 106 | 97  | 3  | 4  | 3  | 91  | 98  | 82  | 5  | 8  | 7  |
| 4.1 | Sulfamethoxazole            | 93  | 95  | 90  | 7   | 4  | 10 | 96  | 98  | 100 | 4  | 7  | 3  | 94  | 91  | 86  | 9  | 6  | 1  |
| 4.5 | Desmethylvenlafaxine        | 108 | 112 | 101 | 1   | 4  | 3  | 114 | 110 | 107 | 0  | 2  | 4  | 110 | 109 | 103 | 6  | 6  | 3  |
| 4.7 | Acebutolol                  | 102 | 110 | 99  | 3   | 4  | 6  | 106 | 110 | 100 | 9  | 2  | 2  | 105 | 108 | 99  | 5  | 4  | 0  |
| 4.7 | Lamotrigine                 | 101 | 96  | 89  | 9   | 6  | 6  | 102 | 111 | 95  | 12 | 8  | 1  | 97  | 100 | 90  | 4  | 5  | 8  |
| 4.8 | Primidone                   | 107 | 104 | 95  | 7   | 3  | 1  | 103 | 111 | 106 | 10 | 8  | 5  | 107 | 101 | 97  | 9  | 3  | 4  |
| 4.8 | Metoprolol                  | 111 | 105 | 102 | 14  | 11 | 3  | 115 | 109 | 99  | 10 | 5  | 10 | 119 | 103 | 97  | 3  | 2  | 5  |
| 4.9 | Fluconazole                 | 95  | 95  | 97  | 4   | 6  | 15 | 100 | 96  | 103 | 4  | 1  | 4  | 102 | 96  | 90  | 8  | 5  | 3  |
| 5.4 | Ifosfamide                  | 119 | 117 | 106 | 5   | 3  | 7  | 105 | 103 | 101 | 3  | 1  | 4  | 124 | 112 | 107 | 5  | 4  | 3  |
| 5.5 | 4-Hydroxy Omeprazole        | 102 | 96  | 92  | 4   | 5  | 6  | 97  | 103 | 97  | 3  | 4  | 1  | 103 | 98  | 89  | 3  | 8  | 4  |
| 5.9 | Chlorpheniramine            | 141 | 100 | 76  | 4   | 5  | 5  | 121 | 135 | 82  | 6  | 12 | 10 | 140 | 100 | 77  | 8  | 4  | 4  |
| 5.9 | Carbamazepine-10,11-epoxide | 116 | 105 | 98  | 8   | 3  | 5  | 102 | 105 | 97  | 1  | 5  | 0  | 115 | 107 | 96  | 10 | 7  | 3  |
| 5.9 | Venlafaxine                 | 106 | 115 | 107 | 10  | 5  | 6  | 105 | 108 | 97  | 6  | 2  | 2  | 109 | 113 | 106 | 5  | 3  | 4  |
| 5.9 | Bisoprolol                  | 100 | 108 | 97  | 5   | 5  | 6  | 98  | 104 | 96  | 16 | 5  | 3  | 102 | 104 | 99  | 1  | 7  | 1  |
| 6.1 | Propranolol                 | 114 | 110 | 104 | 9   | 2  | 4  | 97  | 110 | 96  | 6  | 5  | 4  | 115 | 109 | 104 | 10 | 7  | 3  |
| 6.2 | Citalopram                  | 90  | 118 | 104 | 2   | 4  | 4  | 102 | 105 | 97  | 23 | 13 | 1  | 94  | 116 | 102 | 1  | 2  | 3  |
| 6.2 | Desmethylcitalopram         | 103 | 113 | 102 | 6   | 7  | 8  | 120 | 124 | 111 | 24 | 11 | 5  | 98  | 116 | 106 | 3  | 1  | 3  |
| 6.5 | Omeprazole                  | b   | 131 | 97  | b   | 20 | 31 | b   | 109 | 103 | b  | 49 | 19 | b   | 102 | 109 | b  | 11 | 30 |
| 6.8 | Hydroxyibuprofen            | a   | 108 | 101 | a   | 2  | 5  | a   | 106 | 93  | a  | 2  | 5  | a   | 105 | 104 | a  | 8  | 7  |
| 6.9 | Carbamazepine               | 107 | 107 | 101 | 3   | 8  | 8  | 103 | 104 | 96  | 2  | 7  | 1  | 112 | 105 | 99  | 8  | 8  | 6  |
| 7.1 | Mebendazole                 | 172 | 218 | 192 | 4   | 5  | 4  | 12  | 199 | 199 | 10 | 3  | 2  | 185 | 210 | 196 | 7  | 10 | 2  |
| 7.3 | Fexofenadine                | 112 | 113 | 103 | 2   | 3  | 8  | a   | 112 | 102 | 6  | 5  | 1  | 114 | 110 | 105 | 7  | 8  | 7  |
| 7.4 | Erythromycin                | 224 | 46  | b   | 5   | 4  | 4  | 107 | 78  | b   | 32 | 28 | 8  | 228 | 45  | b   | 3  | 5  | 4  |
| 7.5 | Lansoprazole                | 152 | 152 | 75  | 105 | 49 | 27 | b   | 107 | 53  | b  | 27 | 33 | b   | b   | 96  | b  | b  | 18 |
| 7.6 | Oxazepam                    | 121 | 111 | 96  | 10  | 1  | 11 | 116 | 109 | 98  | 3  | 4  | 11 | 114 | 110 | 103 | 11 | 13 | 12 |

|     |                               |     |     |     |    |    |    |     |     |     |    |    |    |     |     |     |    |    |    |
|-----|-------------------------------|-----|-----|-----|----|----|----|-----|-----|-----|----|----|----|-----|-----|-----|----|----|----|
| 7.6 | Lorazepam                     | 122 | 102 | 94  | 14 | 10 | 6  | 111 | 111 | 102 | 19 | 11 | 9  | 120 | 106 | 93  | 19 | 12 | 16 |
| 7.7 | Climbazole                    | 170 | 169 | 149 | 1  | 2  | 6  | 161 | 141 | 133 | 3  | 3  | 6  | 213 | 156 | 121 | 15 | 9  | 7  |
| 7.7 | Fluoxetine                    | 97  | 88  | 90  | 8  | 6  | 9  | 91  | 99  | 100 | 29 | 11 | 19 | 98  | 91  | 86  | 6  | 5  | 1  |
| 7.8 | Temazepam                     | 122 | 105 | 96  | 8  | 12 | 6  | 118 | 104 | 103 | 5  | 1  | 10 | 112 | 108 | 102 | 10 | 7  | 12 |
| 7.8 | Ketoprofen                    | 118 | 105 | 96  | 5  | 6  | 9  | 116 | 108 | 103 | 12 | 6  | 13 | 117 | 102 | 100 | 15 | 5  | 15 |
| 7.9 | Cetirizine                    | a   | 235 | 222 | a  | 3  | 6  | a   | 206 | 185 | a  | 2  | 5  | 352 | 242 | 214 | 9  | 1  | 6  |
| 8.1 | Clarithromycin                | 107 | 116 | 100 | 1  | 2  | 6  | 125 | 105 | 103 | 29 | 2  | 6  | 106 | 116 | 100 | 7  | 2  | 5  |
| 8.1 | Norethisterone                | 103 | 111 | 104 | 11 | 11 | 7  | 106 | 106 | 99  | 5  | 5  | 6  | 125 | 110 | 98  | 12 | 8  | 8  |
| 8.1 | Bezafibrate                   | 110 | 100 | 94  | 5  | 8  | 8  | 101 | 102 | 98  | 8  | 5  | 2  | 114 | 102 | 89  | 10 | 7  | 5  |
| 8.2 | Crotamiton                    | 147 | 154 | 138 | 6  | 3  | 10 | 142 | 187 | 146 | 31 | 26 | 12 | 140 | 173 | 132 | 15 | 17 | 7  |
| 8.2 | Clotrimazole                  | 99  | 98  | 91  | 1  | 3  | 8  | 103 | 108 | 103 | 3  | 8  | 6  | 100 | 97  | 92  | 9  | 5  | 5  |
| 8.2 | Warfarin                      | 114 | 106 | 95  | 5  | 8  | 7  | 115 | 109 | 98  | 3  | 2  | 2  | 114 | 107 | 93  | 7  | 10 | 7  |
| 9.0 | Atorvastatin                  | 113 | 101 | 91  | 2  | 3  | 1  | 139 | 131 | 117 | 2  | 1  | 3  | 135 | 129 | 116 | 4  | 3  | 4  |
| 9.4 | Miconazole                    | 157 | 178 | 174 | 4  | 10 | 13 | 47  | 52  | 41  | 5  | 3  | 13 | 37  | 104 | 104 | 8  | 9  | 18 |
| 5.6 | Estriol                       | 120 | 109 | 91  | 16 | 1  | 4  | 127 | 114 | 92  | 8  | 5  | 5  | 116 | 110 | 95  | 6  | 1  | 5  |
| 6.0 | Naproxen                      | a   | 107 | 109 | a  | 12 | 12 | b   | 122 | 87  | b  | 5  | 8  | b   | 121 | 96  | b  | 11 | 3  |
| 7.1 | Diclofenac                    | b   | 102 | 115 | b  | 6  | 11 | b   | 121 | 95  | b  | 10 | 11 | b   | 109 | 106 | b  | 12 | 3  |
| 7.4 | 17 $\beta$ -Estradiol         | 109 | 100 | 96  | 6  | 9  | 7  | 115 | 106 | 96  | 22 | 7  | 6  | 111 | 103 | 89  | 7  | 3  | 5  |
| 7.5 | Estrone                       | 122 | 110 | 95  | 4  | 2  | 2  | 100 | 106 | 98  | 9  | 7  | 8  | 105 | 102 | 94  | 5  | 2  | 5  |
| 7.5 | 17 $\alpha$ -Ethinylestradiol | 115 | 115 | 99  | 4  | 9  | 5  | 83  | 104 | 107 | b  | 8  | 8  | 117 | 104 | 93  | 1  | 4  | 3  |
| 7.5 | Ibuprofen                     | b   | a   | 106 | b  | 9  | 6  | b   | 124 | 98  | b  | 2  | 14 | b   | 121 | 110 | b  | 9  | 6  |
| 8.7 | Gemfibrozil                   | 116 | 94  | 104 | 13 | 8  | 10 | a   | 114 | 88  | 4  | 13 | 4  | 99  | 105 | 93  | 15 | 13 | 3  |

a) concentration in sample higher than spiked levels, b) concentration above or below MQL

Table S12: Method accuracy and precision (both in %) for liquid samples analysed after SPE and sludge, spiked at three concentrations. Concentrations were 0.01, 0.1 and 0.5  $\mu\text{g L}^{-1}$  in influent and effluent, 0.005, 0.05, and 0.25  $\mu\text{g L}^{-1}$  in river water, and 50, 250, and 500  $\text{ng g}^{-1}$  in the sludge (n = 3).

| RT | Analyte | Influent | Effluent | River | Sludge |
|----|---------|----------|----------|-------|--------|
|----|---------|----------|----------|-------|--------|

| /min | Accuracy                 |     |     | Precision |    |    | Accuracy |     |                  | Precision        |    |    | Accuracy |     |     | Precision |    |    |     |     |     |     |    |    |    |
|------|--------------------------|-----|-----|-----------|----|----|----------|-----|------------------|------------------|----|----|----------|-----|-----|-----------|----|----|-----|-----|-----|-----|----|----|----|
|      | 1                        | 10  | 50  | 1         | 10 | 50 | 1        | 10  | 50               | 1                | 10 | 50 | 10       | 50  | 100 | 1         | 10 | 50 |     |     |     |     |    |    |    |
| 0.7  | Guanylurea               | a   | a   | a         | a  | a  | a        | a   | a                | a                | a  | a  | a        | a   | a   | a         | a  | a  |     |     |     |     |    |    |    |
| 0.8  | Metformin                | a   | a   | a         | a  | a  | a        | a   | a                | a                | a  | a  | a        | a   | a   | a         | a  | a  |     |     |     |     |    |    |    |
| 1.2  | Sulfanilamide            | b   | 98  | 108       | b  | 5  | 5        | b   | 73 <sup>b</sup>  | 134 <sup>b</sup> | b  | 19 | 17       | 99  | 82  | 85        | b  | 8  | 4   | a   | a   | a   | a  | a  | a  |
| 1.7  | Cotinine                 | 118 | 97  | 98        | 6  | 3  | 2        | c   | 100 <sup>b</sup> | 74 <sup>b</sup>  | c  | 6  | 1        | 113 | 96  | 105       | 4  | 6  | 8   | 100 | 102 | 88  | 6  | 1  | 4  |
| 2.0  | Amidotrizoic acid        | a   | a   | a         | a  | a  | a        | a   | a                | a                | a  | a  | a        | a   | a   | a         | a  | a  | a   | a   | a   | a   | a  | a  | a  |
| 2.2  | Amoxicillin              | b   | 119 | 77        | b  | 22 | 16       | b   | 117              | 92               | b  | 8  | 10       | b   | b   | 150       | b  | b  | 1   | a   | a   | a   | a  | a  | a  |
| 2.3  | Sotalol                  | 106 | 95  | 96        | 19 | 3  | 4        | 108 | 106              | 105              | 3  | 9  | 4        | 99  | 96  | 101       | 7  | 5  | 0.3 | 78  | 80  | 76  | 5  | 4  | 1  |
| 2.4  | Paracetamol              | c   | c   | c         | c  | c  | c        | c   | c                | c                | c  | c  | c        | b   | 117 | 99        | b  | 12 | 0.2 | c   | c   | c   | c  | c  | c  |
| 2.5  | Salbutamol               | 93  | 94  | 90        | 9  | 1  | 4        | 101 | 98               | 93               | 7  | 1  | 5        | 91  | 92  | 94        | 8  | 3  | 4   | 107 | 97  | 87  | 14 | 10 | 5  |
| 2.5  | Ranitidine               | b   | 88  | 112       | b  | 11 | 8        | c   | 98               | 116              | c  | 4  | 3        | b   | 92  | 108       | b  | 18 | 13  | 84  | 97  | 106 | 12 | 12 | 11 |
| 2.5  | Atenolol                 | 86  | 106 | 99        | 4  | 3  | 6        | c   | 82               | 97               | c  | 9  | 8        | 98  | 93  | 101       | 8  | 7  | 10  | a   | 107 | 89  | a  | 8  | 4  |
| 2.6  | Sulfadiazine             | 101 | 96  | 99        | 9  | 9  | 5        | c   | 110              | 111              | c  | 13 | 14       | 107 | 97  | 93        | 11 | 3  | 7   | 66  | 100 | 111 | 14 | 29 | 10 |
| 2.9  | 3-Methoxy Paracetamol    | c   | 98  | 97        | 1  | 1  | 4        | c   | c                | 123              | c  | c  | 5        | 93  | 89  | 94        | 6  | 6  | 7   | 84  | 86  | 94  | 4  | 9  | 5  |
| 3.0  | 3-Desmethyl Trimethoprim | 114 | 104 | 103       | 4  | 2  | 7        | c   | 124              | 104              | c  | 5  | 1        | 102 | 113 | 107       | 9  | 13 | 4   | 112 | 98  | 104 | 7  | 12 | 18 |
| 3.1  | α-Hydroxy Trimethoprim   | 135 | 94  | 94        | 5  | 16 | 9        | 107 | 108              | 115              | 2  | 3  | 10       | 96  | 99  | 93        | 18 | 2  | 2   | 127 | 107 | 86  | 5  | 11 | 16 |
| 3.3  | Clopidol                 | b   | 100 | 97        | b  | 17 | 5        | b   | 106              | 109              | b  | 5  | 12       | b   | 96  | 97        | b  | 8  | 2   | 120 | 113 | 105 | 9  | 14 | 4  |
| 3.3  | Gabapentin               | a   | a   | a         | a  | a  | a        | a   | a                | a                | a  | a  | a        | a   | a   | a         | a  | a  | a   | a   | a   | a   | a  | a  | a  |
| 3.6  | Trimethoprim             | 85  | 111 | 103       | 4  | 7  | 5        | c   | 124              | 101              | c  | 5  | 9        | 60  | 120 | 106       | 4  | 22 | 3   | 84  | 82  | 83  | 16 | 19 | 4  |
| 3.6  | Caffeine                 | c   | c   | c         | c  | c  | c        | c   | c                | c                | c  | c  | c        | 76  | 108 | 98        | 6  | 10 | 1   | c   | c   | c   | c  | c  | c  |
| 3.7  | Ofloxacin                | 115 | 101 | 136       | 16 | 16 | 3        | 78  | 117              | 60               | 23 | 18 | 14       | b   | 106 | 133       | b  | 13 | 33  | a   | a   | a   | a  | a  | a  |
| 3.9  | Ciprofloxacin            | b   | 80  | 78        | b  | 7  | 5        | b   | 105              | 65               | b  | 14 | 11       | b   | 81  | 78        | b  | 13 | 34  | 167 | 152 | 97  | 35 | 2  | 8  |
| 4.0  | Lidocaine                | 93  | 98  | 91        | 2  | 0  | 4        | c   | 99               | 117              | c  | 6  | 16       | 88  | 94  | 102       | 5  | 5  | 9   | 102 | 97  | 61  | 5  | 8  | 12 |
| 4.1  | Sulfamethoxazole         | 106 | 99  | 105       | 1  | 5  | 4        | 118 | 103              | 100              | 1  | 3  | 11       | 106 | 105 | 100       | 5  | 10 | 2   | 88  | 91  | 126 | 16 | 24 | 4  |
| 4.5  | Desmethylvenlafaxine     | 99  | 105 | 106       | 5  | 2  | 10       | c   | 119              | 98               | c  | 5  | 5        | 101 | 104 | 104       | 9  | 3  | 2   | 96  | 102 | 112 | 9  | 3  | 5  |

|     |                             |     |     |     |    |    |    |     |     |     |     |    |    |     |     |     |    |    |    |     |     |     |    |    |    |
|-----|-----------------------------|-----|-----|-----|----|----|----|-----|-----|-----|-----|----|----|-----|-----|-----|----|----|----|-----|-----|-----|----|----|----|
| 4.7 | Acebutolol                  | 90  | 104 | 96  | 3  | 3  | 5  | 99  | 102 | 94  | 2   | 1  | 2  | 96  | 99  | 95  | 1  | 3  | 6  | 103 | 107 | 88  | 1  | 4  | 7  |
| 4.7 | Lamotrigine                 | 106 | 92  | 88  | 8  | 13 | 2  | 121 | 88  | 100 | 12  | 7  | 18 | 100 | 89  | 98  | 2  | 9  | 6  | c   | 101 | 92  | c  | 7  | 12 |
| 4.8 | Metoprolol                  | 99  | 105 | 105 | 12 | 1  | 5  | 153 | 106 | 101 | 13  | 7  | 7  | 117 | 95  | 98  | 3  | 4  | 0  | 89  | 93  | 91  | 1  | 8  | 13 |
| 4.8 | Primidone                   | 102 | 102 | 103 | 4  | 7  | 3  | 111 | 103 | 104 | 7   | 5  | 11 | 105 | 100 | 101 | 13 | 5  | 1  | 90  | 94  | 86  | 5  | 6  | 1  |
| 4.9 | Fluconazole                 | 100 | 92  | 106 | 16 | 8  | 4  | 100 | 105 | 107 | 7   | 3  | 9  | 105 | 100 | 95  | 5  | 4  | 1  | 110 | 112 | 110 | 1  | 4  | 3  |
| 5.4 | Ifosfamide                  | 98  | 99  | 102 | 9  | 0  | 1  | 99  | 87  | 84  | 4   | 5  | 6  | 112 | 94  | 94  | 13 | 2  | 3  | 112 | 122 | 146 | 7  | 5  | 15 |
| 5.5 | 4-Hydroxy Omeprazole        | c   | c   | c   | c  | c  | c  | b   | 87  | 100 | b   | 6  | 15 | 99  | 93  | 99  | 10 | 2  | 4  | 116 | 91  | 92  | 12 | 6  | 8  |
| 5.9 | Chlorpheniramine            | c   | c   | 96  | c  | c  | 5  | c   | 109 | 104 | c   | 5  | 1  | 116 | 72  | 122 | 4  | 6  | 6  | 88  | 163 | 101 | 2  | 2  | 24 |
| 5.9 | Carbamazepine-10,11-epoxide | 118 | 100 | 95  | 20 | 3  | 2  | 108 | 92  | 100 | 9   | 8  | 23 | 116 | 97  | 100 | 11 | 5  | 10 | 75  | 83  | 83  | 4  | 6  | 5  |
| 5.9 | Venlafaxine                 | 119 | 103 | 107 | 8  | 5  | 5  | c   | 104 | 107 | c   | 2  | 4  | 92  | 113 | 123 | 7  | 1  | 4  | c   | 119 | 104 | c  | 4  | 1  |
| 5.9 | Bisoprolol                  | 101 | 103 | 102 | 2  | 6  | 4  | c   | 104 | 98  | c   | 3  | 3  | 103 | 103 | 100 | 3  | 5  | 1  | 92  | 91  | 91  | 1  | 2  | 2  |
| 6.1 | Propranolol                 | 116 | 112 | 105 | 6  | 2  | 2  | 98  | 112 | 98  | 10  | 11 | 7  | b   | 111 | 106 | b  | 20 | 8  | c   | 81  | 88  | c  | 3  | 5  |
| 6.2 | Citalopram                  | c   | c   | 70  | c  | c  | 2  | c   | 91  | 76  | c   | 7  | 1  | 91  | 102 | 100 | 14 | 7  | 10 | c   | 118 | 101 | c  | 3  | 5  |
| 6.2 | Desmethylcitalopram         | c   | 106 | 112 | c  | 0  | 3  | c   | 117 | 104 | c   | 8  | 2  | b   | 97  | 105 | b  | 3  | 0  | c   | c   | 110 | c  | c  | 12 |
| 6.5 | Omeprazole                  | a   | a   | a   | a  | a  | a  | b   | 141 | 127 | b   | 12 | 13 | b   | 127 | 83  | b  | 19 | 18 | a   | a   | a   | a  | a  | a  |
| 6.8 | Hydroxyibuprofen            | c   | c   | c   | c  | c  | c  | c   | c   | c   | c   | c  | c  | b   | 100 | 97  | b  | 4  | 18 | c   | 105 | 68  | c  | 6  | 6  |
| 6.9 | Carbamazepine               | 111 | 110 | 106 | 4  | 1  | 2  | 112 | 103 | 99  | 0.5 | 3  | 9  | 110 | 107 | 109 | 5  | 6  | 6  | 102 | 97  | 91  | 3  | 3  | 5  |
| 7.1 | Mebendazole                 | b   | 172 | 200 | b  | 6  | 4  | b   | 170 | 246 | b   | 1  | 5  | b   | 193 | 223 | b  | 2  | 11 | c   | 115 | 108 | c  | 8  | 4  |
| 7.3 | Fexofenadine                | c   | 105 | 106 | c  | 2  | 6  | c   | c   | c   | c   | c  | c  | 99  | 108 | 102 | 19 | 8  | 2  | c   | c   | c   | c  | c  | c  |
| 7.4 | Erythromycin                | 63  | 50  | 58  | 5  | 2  | 10 | 171 | 43  | 30  | 28  | 7  | 11 | 238 | 51  | b   | 22 | 21 | b  | 86  | 87  | 75  | 12 | 6  | 5  |
| 7.5 | Lansoprazole                | a   | a   | a   | a  | a  | a  | a   | a   | a   | a   | a  | a  | a   | a   | a   | a  | a  | a  | a   | a   | a   | a  | a  | a  |
| 7.6 | Oxazepam                    | 178 | 104 | 103 | 7  | 6  | 9  | c   | 111 | 113 | c   | 10 | 10 | 130 | 99  | 90  | 12 | 11 | 13 | 118 | 93  | 87  | 3  | 5  | 13 |
| 7.6 | Lorazepam                   | b   | 115 | 111 | b  | 1  | 6  | b   | 115 | 104 | b   | 17 | 8  | b   | 105 | 100 | b  | 6  | 11 | 98  | 88  | 58  | 4  | 1  | 17 |
| 7.7 | Climbazole                  | b   | 77  | 125 | b  | 1  | 1  | b   | 101 | 122 | b   | 1  | 4  | b   | 114 | 120 | b  | 24 | 32 | 54  | 99  | 116 | 9  | 11 | 8  |
| 7.7 | Fluoxetine                  | 101 | 97  | 96  | 17 | 9  | 33 | 92  | 107 | 100 | 20  | 8  | 21 | a   | a   | a   | a  | a  | a  | 97  | 76  | 109 | 18 | 26 | 17 |
| 7.8 | Temazepam                   | 129 | 97  | 97  | 3  | 1  | 3  | 110 | 110 | 104 | 9   | 18 | 9  | 124 | 102 | 97  | 19 | 9  | 8  | 129 | 134 | 107 | 6  | 12 | 17 |

|     |                               |     |     |     |    |    |    |     |     |     |    |    |    |     |     |     |    |    |    |     |     |     |    |    |    |
|-----|-------------------------------|-----|-----|-----|----|----|----|-----|-----|-----|----|----|----|-----|-----|-----|----|----|----|-----|-----|-----|----|----|----|
| 7.8 | Ketoprofen                    | 114 | 104 | 101 | 5  | 1  | 3  | 110 | 124 | 101 | 4  | 15 | 9  | 124 | 105 | 110 | 14 | 8  | 15 | 114 | 115 | 115 | 12 | 12 | 4  |
| 7.9 | Cetirizine                    | 237 | 162 | 164 | 5  | 3  | 5  | c   | c   | c   | c  | c  | c  | 225 | 195 | 193 | 12 | 8  | 4  | c   | 119 | 86  | c  | 15 | 8  |
| 8.1 | Clarithromycin                | 86  | 93  | 101 | 5  | 10 | 9  | 89  | 98  | 91  | 2  | 10 | 4  | 94  | 103 | 86  | 4  | 4  | 1  | 81  | 110 | 74  | 12 | 8  | 3  |
| 8.1 | Norethisterone                | b   | 104 | 109 | b  | 6  | 4  | b   | 115 | 92  | b  | 17 | 3  | 112 | 101 | 110 | 21 | 8  | 7  | 138 | 100 | 90  | 8  | 4  | 5  |
| 8.1 | Bezafibrate                   | 97  | 99  | 90  | 13 | 3  | 6  | b   | 109 | 93  | b  | 9  | 4  | 110 | 92  | 101 | 4  | 3  | 15 | 63  | 87  | 89  | 4  | 3  | 1  |
| 8.2 | Clotrimazole                  | b   | 116 | 126 | b  | 14 | 10 | 151 | 150 | 160 | 11 | 7  | 5  | b   | 148 | 130 | b  | 30 | 11 | b   | 108 | 101 | b  | 12 | 5  |
| 8.2 | Crotamiton                    | 92  | 99  | 99  | 2  | 4  | 7  | c   | c   | c   | c  | c  | c  | 120 | 95  | 93  | 13 | 11 | 7  | 83  | 115 | 122 | 10 | 18 | 11 |
| 8.2 | Warfarin                      | 129 | 106 | 103 | 6  | 1  | 7  | 142 | 99  | 82  | 3  | 9  | 7  | 112 | 98  | 104 | 3  | 7  | 8  | 106 | 122 | 125 | 12 | 7  | 7  |
| 9.0 | Atorvastatin                  | 74  | 135 | 138 | 16 | 5  | 6  | c   | c   | c   | c  | c  | c  | 90  | 144 | 143 | 20 | 3  | 1  | c   | 126 | 120 | c  | 33 | 6  |
| 9.4 | Miconazole                    | 89  | 59  | 59  | 8  | 4  | 28 | 96  | 115 | 159 | 18 | 20 | 26 | a   | a   | a   | 5  | 6  | 27 | c   | 125 | 98  | c  | 16 | 26 |
| 5.6 | Estriol                       | 97  | 97  | 104 | 8  | 6  | 4  | c   | 88  | 89  | c  | 11 | 2  | 102 | 101 | 98  | 6  | 8  | 14 | 94  | 80  | 94  | 2  | 7  | 18 |
| 6.0 | Naproxen                      | b   | 106 | 110 | b  | 11 | 3  | b   | c   | c   | b  | c  | c  | 98  | 99  | 92  | 7  | 7  | 10 | c   | 98  | 86  | c  | 12 | 5  |
| 7.1 | Diclofenac                    | b   | 94  | 109 | b  | 7  | 3  | c   | c   | 98  | c  | c  | 16 | 94  | 123 | 104 | 13 | 11 | 14 | c   | c   | 92  | c  | c  | 16 |
| 7.4 | 17 $\beta$ -Estradiol         | 96  | 98  | 97  | 10 | 7  | 5  | 111 | 109 | 91  | 13 | 9  | 4  | 118 | 98  | 99  | b  | 5  | 10 | 110 | 84  | 83  | 18 | 4  | 11 |
| 7.5 | Estrone                       | 75  | 94  | 100 | 7  | 1  | 4  | c   | 100 | 87  | c  | 2  | 1  | 102 | 101 | 98  | 11 | 12 | 10 | 104 | 84  | 71  | 6  | 5  | 4  |
| 7.5 | 17 $\alpha$ -Ethinylestradiol | b   | 103 | 94  | b  | 5  | 7  | b   | 101 | 91  | b  | 0  | 7  | b   | 89  | 109 | b  | 13 | 11 | 107 | 85  | 86  | 11 | 3  | 14 |
| 7.5 | Ibuprofen                     | c   | c   | c   | c  | c  | c  | c   | c   | c   | c  | c  | c  | b   | 75  | 101 | b  | 11 | 10 | c   | c   | c   | c  | c  | c  |
| 8.7 | Gemfibrozil                   | 101 | 105 | 116 | 16 | 9  | 3  | 91  | 109 | 104 | 21 | 43 | 16 | 120 | 117 | 106 | 7  | 9  | 16 | 60  | 86  | 73  | 11 | 17 | 20 |

a) method not suitable, b) concentration above or below MQL, c) concentration in sample higher than spiked levels

## References

- [1] Personal Health Analytics, Drugbank, accessed 08/2022, (n.d.). <https://www.drugbank.com/>.
- [2] K. Proctor, B. Petrie, R. Barden, T. Arnot, B. Kasprzyk-Hordern, Multi-residue ultra-performance liquid chromatography coupled with tandem mass spectrometry method for comprehensive multi-class anthropogenic compounds of emerging concern analysis in a catchment-based exposure-driven study, *Analytical and Bioanalytical Chemistry*. 411 (2019) 7061--7086. <https://doi.org/10.1007/s00216-019-02091-8>.
- [3] Royal Society of Chemistry, ChemSpider, accessed 08/2022, (2022). <https://www.chemspider.com/>.
- [4] ChEMBL Database, accessed 08/2022, (2022). <https://www.ebi.ac.uk/chembl/>.

- [5] ISD Scotland National Statistics. Prescription cost analysis for financial year 2018/19, accessed 30/03/2021, (2019).  
<https://www.isdscotland.org/Health-Topics/Prescribing-and-Medicines/Community-Dispensing/Dispenser-Remuneration/>.
- [6] J.P. Bound, N. Voulvoulis, Predicted and measured concentrations for selected pharmaceuticals in UK rivers: Implications for risk assessment, *Water Res.* 40 (2006) 2885–2892. <https://doi.org/10.1016/j.watres.2006.05.036>.
- [7] European Medicines Agency, Guideline on the Environmental Risk Assessment of Medicinal Products for Human Use, 2006.
- [8] Scottish Water, Summary of Assets, licences, Intern information, 2015.
